# Supplementary material for: Mechanistic insights into iron catalyzed dehydrogenation of formic acid: β-hydride elimination vs. direct hydride transfer
Source: Royal Society of Chemistry journal article supplement (doi:10.1039/c3dt50908g), 2013-01-01
Supplement: c3dt50908g.pdf [file c3dt50908g.pdf]

## Supporting Information

### Mechanistic insights into iron catalyzed dehydrogenation of formic acid: $\beta$ -hydride elimination vs. direct hydride transfer

Xinzheng Yang\*

State Key Laboratory for Structural Chemistry of Unstable and Stable Species  
Institute of Chemistry, Chinese Academy of Sciences  
Beijing 100190, China  
E-mail: xyang@iccas.ac.cn

#### Solvent corrected absolute free energies (Hartree) and Cartesian coordinates (Å) of all optimized structures

|                                  |             |             |             |   |             |             |             |
|----------------------------------|-------------|-------------|-------------|---|-------------|-------------|-------------|
| <b>H<sub>2</sub></b>             |             |             |             | P | 0.05626200  | 0.70134800  | -2.36092900 |
| G <sub>solv</sub> = -1.171383    |             |             |             | C | -0.34774400 | -0.93289300 | -3.15589900 |
| H                                | 0.00000000  | 0.00000000  | 0.38461800  | C | -0.97384000 | -1.89750200 | -2.13638700 |
| H                                | 0.00000000  | 0.00000000  | -0.38461800 | C | -1.16206400 | 1.94743200  | -2.99943600 |
| <b>HCOOH</b>                     |             |             |             | C | -2.04621900 | 2.47115800  | -1.84740800 |
| G <sub>solv</sub> = -189.683018  |             |             |             | C | 1.73880000  | 1.11661500  | -3.00700600 |
| H                                | -0.09987200 | 1.50026800  | 0.00002500  | C | 2.76163300  | 0.44381500  | -2.07551400 |
| C                                | -0.12446700 | 0.40168900  | 0.00000900  | C | 1.12542400  | -2.87188600 | -0.38458400 |
| O                                | 1.10846700  | -0.09155100 | -0.00001000 | C | 1.53035200  | -3.40456700 | 0.85138700  |
| O                                | -1.13617500 | -0.26405100 | 0.00000400  | C | 2.60053600  | -4.29686600 | 0.92706200  |
| H                                | 1.06833700  | -1.06558300 | -0.00002700 | C | 3.28520500  | -4.67294900 | -0.23174000 |
| <b>HCOO<sup>-</sup></b>          |             |             |             | C | 2.89415400  | -4.14992600 | -1.46542700 |
| G <sub>solv</sub> = -189.242247  |             |             |             | C | 1.82340800  | -3.25490800 | -1.54178300 |
| H                                | -0.00009600 | 1.45754600  | 0.00000700  | C | -1.43752400 | -2.38765400 | 0.71689500  |
| C                                | -0.00004300 | 0.33721500  | -0.00000300 | C | -1.58520500 | -1.78544300 | 1.97514000  |
| O                                | 1.12700600  | -0.21753500 | 0.00000100  | C | -2.46606800 | -2.31955900 | 2.91825900  |
| O                                | -1.12696200 | -0.21756900 | 0.00000100  | C | -3.21738000 | -3.45362300 | 2.60179800  |
| <b>CO<sub>2</sub></b>            |             |             |             | C | -3.07841300 | -4.05929700 | 1.34891600  |
| G <sub>solv</sub> = -188.520067  |             |             |             | C | -2.18526800 | -3.53509100 | 0.41191300  |
| C                                | 0.18315000  | -0.07326000 | 0.00000000  | C | -3.55323600 | 0.29353200  | -0.63471700 |
| O                                | 1.34772800  | -0.07326000 | 0.00000000  | C | -4.22667400 | -0.25120200 | 0.47192800  |
| O                                | -0.98142800 | -0.07326000 | 0.00000000  | C | -5.30529100 | -1.11861200 | 0.29402400  |
| <b>1</b>                         |             |             |             | C | -5.72664000 | -1.45918200 | -0.99452300 |
| G <sub>solv</sub> = -4252.922621 |             |             |             | C | -5.07046100 | -0.91932700 | -2.10259800 |
| Fe                               | 0.03762200  | 0.58641100  | -0.22268900 | C | -3.99195900 | -0.04862000 | -1.92429200 |
| P                                | -0.24219900 | -1.63737000 | -0.44637800 | C | -2.56089200 | 2.37590600  | 1.02241600  |
| P                                | -2.04719100 | 1.32047800  | -0.37996400 | C | -3.69855900 | 3.19542200  | 0.94993300  |
| P                                | 2.25280300  | 0.78165800  | -0.31718300 | C | -4.06076600 | 3.99331100  | 2.03606200  |
|                                  |             |             |             | C | -3.29815000 | 3.96922700  | 3.20770700  |
|                                  |             |             |             | C | -2.17045700 | 3.15008400  | 3.29191600  |
|                                  |             |             |             | C | -1.80072400 | 2.35938700  | 2.20097100  |
|                                  |             |             |             | C | 3.00855700  | 2.44887600  | -0.04741600 |

|   |             |             |             |                                  |             |             |             |
|---|-------------|-------------|-------------|----------------------------------|-------------|-------------|-------------|
| C | 4.26058400  | 2.60052700  | 0.57195900  | <b>2</b>                         |             |             |             |
| C | 4.84239800  | 3.86415100  | 0.70569300  | G <sub>solv</sub> = -4442.610332 |             |             |             |
| C | 4.19079400  | 4.99426900  | 0.20985800  | Fe                               | -0.03846900 | 0.55859000  | 0.25241700  |
| C | 2.94948000  | 4.85688700  | -0.41562800 | P                                | 0.36422400  | -1.69161600 | 0.36847800  |
| C | 2.36030100  | 3.59725900  | -0.53587600 | P                                | 2.08680700  | 1.31557100  | 0.48727900  |
| C | 3.29913400  | -0.27872500 | 0.73623400  | P                                | -2.30077800 | 0.58790500  | 0.47542300  |
| C | 4.44784900  | -0.94329200 | 0.28565400  | P                                | -0.00317800 | 0.54462300  | 2.42261200  |
| C | 5.20528200  | -1.71527900 | 1.17168100  | C                                | 0.45373500  | -1.11563100 | 3.12050300  |
| C | 4.83189900  | -1.81414000 | 2.51383500  | C                                | 1.10670100  | -1.99563700 | 2.04749500  |
| C | 3.68905400  | -1.15176100 | 2.97194600  | C                                | 1.18006400  | 1.79302200  | 3.11309000  |
| C | 2.92225400  | -0.39590000 | 2.08523400  | C                                | 1.99773800  | 2.43106200  | 1.97222300  |
| H | 0.59541700  | -1.33490600 | -3.55134400 | C                                | -1.66431000 | 0.87457100  | 3.15547900  |
| H | -1.01471400 | -0.77635400 | -4.01390800 | C                                | -2.69689600 | 0.18933900  | 2.25176400  |
| H | -0.87321900 | -2.94166500 | -2.45985600 | C                                | -0.99348300 | -2.93509500 | 0.26905600  |
| H | -2.04690200 | -1.68469100 | -2.02755500 | C                                | -1.49730900 | -3.27803200 | -0.99792100 |
| H | -0.60705500 | 2.77221100  | -3.46492800 | C                                | -2.51716200 | -4.21996800 | -1.12828400 |
| H | -1.76544800 | 1.47876900  | -3.78709900 | C                                | -3.06136900 | -4.82647900 | 0.00817000  |
| H | -1.63102900 | 3.40949300  | -1.45645400 | C                                | -2.58064300 | -4.48290600 | 1.27221200  |
| H | -3.06939600 | 2.67606800  | -2.18652200 | C                                | -1.55186400 | -3.54418900 | 1.40288200  |
| H | 1.85877200  | 0.78582500  | -4.04641000 | C                                | 1.57661600  | -2.49343100 | -0.76026200 |
| H | 1.85124700  | 2.20927600  | -2.98564000 | C                                | 1.74772400  | -1.98968300 | -2.05843100 |
| H | 3.78127000  | 0.80131700  | -2.26956500 | C                                | 2.65264000  | -2.58765100 | -2.93951000 |
| H | 2.74641500  | -0.64807400 | -2.21385900 | C                                | 3.39708300  | -3.69590300 | -2.53181400 |
| H | 1.00540500  | -3.12107300 | 1.76245500  | C                                | 3.22477900  | -4.21357700 | -1.24454800 |
| H | 2.90014300  | -4.69683300 | 1.89218800  | C                                | 2.31613300  | -3.62097700 | -0.36597100 |
| H | 4.11694000  | -5.36906600 | -0.17237300 | C                                | 3.56916400  | 0.27019700  | 0.84794200  |
| H | 3.41766100  | -4.43962500 | -2.37233100 | C                                | 4.18921100  | -0.46376800 | -0.17843300 |
| H | 1.53480300  | -2.86612700 | -2.51528300 | C                                | 5.25934900  | -1.31646900 | 0.09611700  |
| H | -1.01086800 | -0.88669200 | 2.20686100  | C                                | 5.72484400  | -1.46224200 | 1.40520800  |
| H | -2.57287100 | -1.84699400 | 3.89062300  | C                                | 5.12318100  | -0.73623800 | 2.43398200  |
| H | -3.91048100 | -3.86637900 | 3.32924700  | C                                | 4.05811300  | 0.12513900  | 2.15786500  |
| H | -3.66252400 | -4.94191800 | 1.10388000  | C                                | 2.69946100  | 2.39701200  | -0.86454700 |
| H | -2.07168000 | -4.02103400 | -0.55556600 | C                                | 3.04909900  | 3.74024400  | -0.65091900 |
| H | -3.90451700 | 0.00229700  | 1.48017000  | C                                | 3.44465500  | 4.54993700  | -1.71948100 |
| H | -5.81532900 | -1.52861900 | 1.16179000  | C                                | 3.50458000  | 4.02981400  | -3.01327700 |
| H | -6.56539100 | -2.13519000 | -1.13327200 | C                                | 3.17213700  | 2.69115200  | -3.23670600 |
| H | -5.39773700 | -1.17165900 | -3.10733700 | C                                | 2.76807400  | 1.88328000  | -2.17272400 |
| H | -3.49270800 | 0.35705700  | -2.80228300 | C                                | -3.14196900 | 2.23403700  | 0.30214200  |
| H | -4.30417800 | 3.20774600  | 0.04507300  | C                                | -4.38858500 | 2.36789400  | -0.33270500 |
| H | -4.93817500 | 4.63041400  | 1.97042200  | C                                | -5.02563900 | 3.61018900  | -0.40673800 |
| H | -3.58394100 | 4.58824800  | 4.05327100  | C                                | -4.43690600 | 4.73871700  | 0.16357200  |
| H | -1.57791400 | 3.12917700  | 4.20207100  | C                                | -3.20231700 | 4.62000900  | 0.80654200  |
| H | -0.91355800 | 1.72728200  | 2.26219400  | C                                | -2.55908400 | 3.38304500  | 0.86896900  |
| H | 4.78766000  | 1.73175700  | 0.95912000  | C                                | -3.43663000 | -0.47968300 | -0.48610200 |
| H | 5.80642200  | 3.96135200  | 1.19717700  | C                                | -4.47550400 | -1.21271900 | 0.10696200  |
| H | 4.64468900  | 5.97565000  | 0.31278800  | C                                | -5.35885100 | -1.95355000 | -0.68348800 |
| H | 2.43376100  | 5.73105100  | -0.80329700 | C                                | -5.22505800 | -1.95837100 | -2.07308800 |
| H | 1.37930800  | 3.50739100  | -0.99958400 | C                                | -4.19564900 | -1.22918100 | -2.67401200 |
| H | 4.75973100  | -0.85967400 | -0.75331500 | C                                | -3.30463800 | -0.50193100 | -1.88526600 |
| H | 6.09012800  | -2.23386900 | 0.81305900  | H                                | -0.47634200 | -1.57173300 | 3.48789900  |
| H | 5.42673500  | -2.40922300 | 3.20079300  | H                                | 1.11567100  | -0.99118500 | 3.98784500  |
| H | 3.39265900  | -1.23159300 | 4.01394000  | H                                | 1.05357600  | -3.05701800 | 2.32153600  |
| H | 2.02207700  | 0.11061800  | 2.43790500  | H                                | 2.17028800  | -1.73650800 | 1.94403300  |
| H | 0.08370700  | 2.12194900  | -0.12965400 | H                                | 0.60503200  | 2.56161400  | 3.64547300  |
|   |             |             |             | H                                | 1.82426900  | 1.30391900  | 3.85374600  |
|   |             |             |             | H                                | 1.47380100  | 3.32900300  | 1.62181700  |

|                         |                |             |             |   |             |             |             |
|-------------------------|----------------|-------------|-------------|---|-------------|-------------|-------------|
| H                       | 2.99659400     | 2.73718000  | 2.30834100  | C | -1.60741500 | -3.22748000 | -0.92953400 |
| H                       | -1.71914200    | 0.50360800  | 4.18698800  | C | -2.66872400 | -4.12752900 | -1.01677600 |
| H                       | -1.82141800    | 1.96100900  | 3.18097300  | C | -3.23949400 | -4.65362200 | 0.14615100  |
| H                       | -3.72052600    | 0.49692800  | 2.50126400  | C | -2.74375200 | -4.27429100 | 1.39417900  |
| H                       | -2.63145200    | -0.90422400 | 2.36092800  | C | -1.67450200 | -3.37735400 | 1.48248200  |
| H                       | -1.08334900    | -2.80873500 | -1.89012500 | C | 1.48470000  | -2.52379100 | -0.75414000 |
| H                       | -2.89167600    | -4.47608200 | -2.11584300 | C | 1.71965300  | -2.02288500 | -2.04241300 |
| H                       | -3.85564900    | -5.56058700 | -0.09306200 | C | 2.60920200  | -2.67099600 | -2.90406000 |
| H                       | -2.99772600    | -4.94913100 | 2.16058100  | C | 3.27096400  | -3.82689400 | -2.48703700 |
| H                       | -1.18759800    | -3.30186000 | 2.39821500  | C | 3.02872200  | -4.34468700 | -1.21104900 |
| H                       | 1.17524600     | -1.12059800 | -2.37480700 | C | 2.13576100  | -3.70273500 | -0.35213500 |
| H                       | 2.77850600     | -2.18352700 | -3.94031700 | C | 3.56977000  | 0.19491700  | 0.89684200  |
| H                       | 4.10568900     | -4.15804500 | -3.21321200 | C | 4.17700400  | -0.61418800 | -0.07889200 |
| H                       | 3.79764000     | -5.07944800 | -0.92427000 | C | 5.20178400  | -1.49702300 | 0.26375500  |
| H                       | 2.19074300     | -4.04145600 | 0.62959100  | C | 5.63554500  | -1.59001300 | 1.58876500  |
| H                       | 3.83405600     | -0.38512100 | -1.20260700 | C | 5.04975000  | -0.78267100 | 2.56499400  |
| H                       | 5.72491500     | -1.87018800 | -0.71482500 | C | 4.02677500  | 0.10515000  | 2.22523000  |
| H                       | 6.55349000     | -2.13074200 | 1.61961700  | C | 2.85474800  | 2.27685800  | -0.92410500 |
| H                       | 5.48258900     | -0.83342900 | 3.45454300  | C | 3.37875000  | 3.56291100  | -0.71654000 |
| H                       | 3.61344100     | 0.67685300  | 2.98075100  | C | 3.89239400  | 4.29881800  | -1.78782800 |
| H                       | 3.02026800     | 4.16892100  | 0.34666900  | C | 3.89665500  | 3.75883900  | -3.07509700 |
| H                       | 3.70932800     | 5.58737300  | -1.53591000 | C | 3.38627500  | 2.47631900  | -3.29108200 |
| H                       | 3.81103400     | 4.66145600  | -3.84178300 | C | 2.86488800  | 1.74229100  | -2.22463900 |
| H                       | 3.21986500     | 2.27589600  | -4.23953800 | C | -3.12604900 | 2.28059500  | 0.28415900  |
| H                       | 2.48551300     | 0.85109200  | -2.36968400 | C | -4.37122400 | 2.43780000  | -0.34838600 |
| H                       | -4.87284500    | 1.50328900  | -0.77925500 | C | -4.99059200 | 3.68941000  | -0.41039800 |
| H                       | -5.98463800    | 3.69005400  | -0.91093700 | C | -4.38413800 | 4.80468000  | 0.16693200  |
| H                       | -4.93320000    | 5.70310800  | 0.10685500  | C | -3.14894200 | 4.66354600  | 0.80383700  |
| H                       | -2.73381200    | 5.49179600  | 1.25486900  | C | -2.52369500 | 3.41723500  | 0.85606400  |
| H                       | -1.58454100    | 3.31808300  | 1.34911200  | C | -3.46570200 | -0.42339600 | -0.53143400 |
| H                       | -4.61077800    | -1.20838400 | 1.18556600  | C | -4.53746300 | -1.11292700 | 0.05507300  |
| H                       | -6.15533700    | -2.52137000 | -0.21050800 | C | -5.44302000 | -1.81870000 | -0.74162400 |
| H                       | -5.91855500    | -2.52814300 | -2.68483200 | C | -5.29559500 | -1.83339700 | -2.12987800 |
| H                       | -4.08405500    | -1.23027500 | -3.75455900 | C | -4.23178900 | -1.14888900 | -2.72327500 |
| H                       | -2.50526900    | 0.06050400  | -2.36194900 | C | -3.32043400 | -0.45358700 | -1.92885800 |
| H                       | -0.18847800    | 2.10609500  | 0.39590400  | H | -0.41312800 | -1.44225600 | 3.55672500  |
| H                       | -0.32183400    | 1.66003200  | -3.56359700 | H | 1.21042000  | -0.85367600 | 3.92536200  |
| C                       | -0.29717800    | 1.66278800  | -2.46831200 | H | 0.97201700  | -3.00101800 | 2.34951800  |
| O                       | -0.51120700    | 2.83497000  | -1.93638900 | H | 2.14741800  | -1.75472600 | 1.91288300  |
| O                       | -0.09647000    | 0.63535700  | -1.82241800 | H | 0.57368700  | 2.72496800  | 3.46304200  |
| H                       | -0.43208300    | 2.69794000  | -0.93859200 | H | 1.77755200  | 1.48697500  | 3.82515500  |
|                         |                |             |             | H | 1.55984800  | 3.36036300  | 1.45338800  |
|                         |                |             |             | H | 3.03446000  | 2.75631900  | 2.22324600  |
|                         |                |             |             | H | -1.71034700 | 0.56592900  | 4.14328300  |
|                         |                |             |             | H | -1.84586100 | 2.01217500  | 3.12767000  |
|                         |                |             |             | H | -3.71354700 | 0.50147600  | 2.47382100  |
|                         |                |             |             | H | -2.59436200 | -0.87669700 | 2.32756200  |
|                         |                |             |             | H | -1.17210000 | -2.82017300 | -1.84174400 |
|                         |                |             |             | H | -3.05569900 | -4.41192900 | -1.99160900 |
|                         |                |             |             | H | -4.06679600 | -5.35423900 | 0.07775400  |
|                         |                |             |             | H | -3.18122500 | -4.67957300 | 2.30226100  |
|                         |                |             |             | H | -1.29826900 | -3.10494300 | 2.46551900  |
|                         |                |             |             | H | 1.20796400  | -1.11951300 | -2.36513800 |
|                         |                |             |             | H | 2.78703500  | -2.26815700 | -3.89743000 |
|                         |                |             |             | H | 3.96801100  | -4.32710900 | -3.15321500 |
|                         |                |             |             | H | 3.53415800  | -5.24936000 | -0.88493700 |
| <b>TS<sub>2,3</sub></b> |                |             |             |   |             |             |             |
| G <sub>solv</sub>       | = -4442.609208 |             |             |   |             |             |             |
| Fe                      | -0.03450400    | 0.59090000  | 0.19136800  |   |             |             |             |
| P                       | 0.31521500     | -1.66351300 | 0.37305500  |   |             |             |             |
| P                       | 2.14980800     | 1.27730100  | 0.44153900  |   |             |             |             |
| P                       | -2.31700600    | 0.61843500  | 0.43594800  |   |             |             |             |
| P                       | 0.00326500     | 0.62539400  | 2.38063800  |   |             |             |             |
| C                       | 0.49389700     | -1.01268800 | 3.10880500  |   |             |             |             |
| C                       | 1.07465400     | -1.95200500 | 2.04514900  |   |             |             |             |
| C                       | 1.16796000     | 1.91542400  | 3.02028800  |   |             |             |             |
| C                       | 2.03803100     | 2.46373800  | 1.86909800  |   |             |             |             |
| C                       | -1.66450700    | 0.92986600  | 3.10913600  |   |             |             |             |
| C                       | -2.68638800    | 0.21466200  | 2.21505100  |   |             |             |             |
| C                       | -1.09149600    | -2.84812500 | 0.32158000  |   |             |             |             |

|                                  |             |             |             |   |             |             |             |
|----------------------------------|-------------|-------------|-------------|---|-------------|-------------|-------------|
| H                                | 1.95275800  | -4.12569800 | 0.63338700  | C | 5.69831500  | -1.65479500 | 1.29224000  |
| H                                | 3.84619700  | -0.56828800 | -1.11371000 | C | 5.07218100  | -1.00875400 | 2.35945200  |
| H                                | 5.65636200  | -2.11473700 | -0.50607600 | C | 4.02756600  | -0.11188300 | 2.12271400  |
| H                                | 6.42939000  | -2.28120200 | 1.85608000  | C | 2.82021100  | 2.35129200  | -0.82709600 |
| H                                | 5.38787000  | -0.83847400 | 3.59575600  | C | 3.44088200  | 3.57650100  | -0.53383000 |
| H                                | 3.58752700  | 0.71832900  | 3.00413300  | C | 3.94603100  | 4.37574800  | -1.56239600 |
| H                                | 3.39544200  | 4.00079600  | 0.27752900  | C | 3.84721300  | 3.95825000  | -2.89094400 |
| H                                | 4.29224800  | 5.29334200  | -1.61206800 | C | 3.24206600  | 2.73575700  | -3.19184100 |
| H                                | 4.29656300  | 4.33314900  | -3.90551900 | C | 2.72887900  | 1.93851700  | -2.16774400 |
| H                                | 3.38838400  | 2.04802200  | -4.28942400 | C | -3.12737100 | 2.27268400  | 0.29688000  |
| H                                | 2.44960800  | 0.75399200  | -2.41019400 | C | -4.24953900 | 2.45808400  | -0.52828000 |
| H                                | -4.86842700 | 1.58433900  | -0.80185400 | C | -4.80930000 | 3.72714400  | -0.70190800 |
| H                                | -5.94972200 | 3.78665100  | -0.91112000 | C | -4.26625600 | 4.83248500  | -0.04815000 |
| H                                | -4.86677300 | 5.77639500  | 0.11951400  | C | -3.15556000 | 4.66314900  | 0.78176600  |
| H                                | -2.66523700 | 5.52513000  | 1.25544200  | C | -2.58820400 | 3.39950300  | 0.94702100  |
| H                                | -1.54919600 | 3.34180000  | 1.33398400  | C | -3.51598400 | -0.45272500 | -0.40674900 |
| H                                | -4.68041000 | -1.10031700 | 1.13265300  | C | -4.64299300 | -1.04101500 | 0.18714500  |
| H                                | -6.26607600 | -2.35267900 | -0.27485500 | C | -5.57441800 | -1.72704100 | -0.59675200 |
| H                                | -6.00577300 | -2.37644500 | -2.74672000 | C | -5.39443600 | -1.82445700 | -1.97813700 |
| H                                | -4.11010100 | -1.15858500 | -3.80261600 | C | -4.27117900 | -1.24807900 | -2.57602700 |
| H                                | -2.49468000 | 0.07560700  | -2.39841100 | C | -3.33439700 | -0.57206300 | -1.79465900 |
| H                                | -0.16938000 | 2.18619100  | 0.31122100  | H | -0.54463100 | -1.55338900 | 3.48648000  |
| H                                | -0.31935200 | 1.67669000  | -3.54541100 | H | 1.05762400  | -1.02372700 | 4.00296500  |
| C                                | -0.28219900 | 1.66064200  | -2.44655000 | H | 0.93621200  | -3.07074700 | 2.31216600  |
| O                                | -0.44895300 | 2.76767400  | -1.84134200 | H | 2.11157500  | -1.79102100 | 1.97719400  |
| O                                | -0.08737400 | 0.57060600  | -1.86411600 | H | 0.70152200  | 2.55628700  | 3.65987400  |
| H                                | -0.30453800 | 2.41430600  | -0.64921700 | H | 1.85893100  | 1.24394200  | 3.88417300  |
|                                  |             |             |             | H | 1.62975700  | 3.28329000  | 1.64852500  |
| <b>3</b>                         |             |             |             | H | 3.10209700  | 2.59630500  | 2.34465300  |
| $G_{\text{solv}} = -4442.622220$ |             |             |             | H | -1.69923800 | 0.53153100  | 4.23943100  |
| Fe                               | -0.06422600 | 0.60751400  | 0.25783800  | H | -1.78939700 | 2.00209700  | 3.25926000  |
| P                                | 0.32988900  | -1.66168900 | 0.37783900  | H | -3.72479300 | 0.60416300  | 2.59140900  |
| P                                | 2.16282200  | 1.25847600  | 0.48690600  | H | -2.69551300 | -0.83800000 | 2.44987200  |
| P                                | -2.36180700 | 0.60250600  | 0.53171200  | H | -1.03721600 | -2.78408400 | -1.93524700 |
| P                                | -0.00300000 | 0.55983400  | 2.46795700  | H | -2.88580900 | -4.39893900 | -2.20533800 |
| C                                | 0.40044400  | -1.12231500 | 3.12916900  | H | -3.98070200 | -5.39597900 | -0.20593200 |
| C                                | 1.03734000  | -2.00880200 | 2.05668500  | H | -3.21111400 | -4.75461100 | 2.07131600  |
| C                                | 1.23972900  | 1.75509500  | 3.13726800  | H | -1.36520900 | -3.15868900 | 2.35570700  |
| C                                | 2.09186800  | 2.34856800  | 1.99523300  | H | 1.20418400  | -1.05014500 | -2.36446600 |
| C                                | -1.65232500 | 0.91484700  | 3.21216700  | H | 2.80973500  | -2.14645100 | -3.90966400 |
| C                                | -2.71930000 | 0.25523600  | 2.32478500  | H | 4.07016500  | -4.16023100 | -3.17313200 |
| C                                | -1.06007600 | -2.85297500 | 0.22816900  | H | 3.70311300  | -5.08180100 | -0.89228700 |
| C                                | -1.50896000 | -3.21431400 | -1.05293600 | H | 2.10036700  | -4.01140400 | 0.63830800  |
| C                                | -2.55208500 | -4.12673600 | -1.20776400 | H | 3.91797900  | -0.32371200 | -1.27809800 |
| C                                | -3.16898900 | -4.68450500 | -0.08457900 | H | 5.76763900  | -1.88560700 | -0.85336400 |
| C                                | -2.73813300 | -4.32411200 | 1.19325400  | H | 6.51049700  | -2.35159600 | 1.47711100  |
| C                                | -1.68878400 | -3.41444000 | 1.35018600  | H | 5.39629400  | -1.19677700 | 3.37890600  |
| C                                | 1.54796700  | -2.43966400 | -0.75430400 | H | 3.55824400  | 0.37687100  | 2.97217300  |
| C                                | 1.75332500  | -1.93257700 | -2.04568700 | H | 3.53983300  | 3.91655100  | 0.49328700  |
| C                                | 2.65711200  | -2.55179100 | -2.91318800 | H | 4.42032800  | 5.32276400  | -1.32176000 |
| C                                | 3.36439200  | -3.68172200 | -2.50022300 | H | 4.24137000  | 4.58158100  | -3.68807300 |
| C                                | 3.15897600  | -4.19986000 | -1.21820700 | H | 3.16478400  | 2.40310800  | -4.22307800 |
| C                                | 2.25260700  | -3.58760800 | -0.35169600 | H | 2.24526300  | 0.99539500  | -2.41291100 |
| C                                | 3.59014900  | 0.14642600  | 0.81289400  | H | -4.69610000 | 1.61447200  | -1.04746700 |
| C                                | 4.23461400  | -0.50277600 | -0.25353000 | H | -5.67286100 | 3.84512300  | -1.35014600 |
| C                                | 5.28179700  | -1.39325000 | -0.01540800 | H | -4.70194100 | 5.81788200  | -0.18348000 |

|                                  |             |             |             |   |             |             |             |
|----------------------------------|-------------|-------------|-------------|---|-------------|-------------|-------------|
| H                                | -2.72320300 | 5.51567200  | 1.29769900  | C | -3.18747900 | 3.35163600  | 1.08884800  |
| H                                | -1.70989700 | 3.31142400  | 1.58318500  | C | -3.60675300 | -0.46279400 | -0.10821000 |
| H                                | -4.81237400 | -0.95719000 | 1.25765500  | C | -4.86567000 | -0.68006100 | 0.47471800  |
| H                                | -6.44338200 | -2.17831100 | -0.12643700 | C | -5.81889600 | -1.45855000 | -0.18354200 |
| H                                | -6.12540800 | -2.34997700 | -2.58569600 | C | -5.52905600 | -2.01289300 | -1.43327500 |
| H                                | -4.12188600 | -1.32819400 | -3.64894400 | C | -4.28296600 | -1.79082700 | -2.02286600 |
| H                                | -2.45808900 | -0.13017000 | -2.26298100 | C | -3.32251700 | -1.02156000 | -1.36209000 |
| H                                | -0.22674700 | 2.20806800  | 0.58368400  | H | -0.75113400 | -1.60386500 | 3.44496900  |
| H                                | -0.44200900 | 1.24892700  | -3.59558800 | H | 0.84951300  | -1.22706200 | 4.08360900  |
| C                                | -0.43684400 | 1.49940000  | -2.51419100 | H | 0.70224200  | -3.18218700 | 2.29108200  |
| O                                | -0.69911800 | 2.66176900  | -2.16376500 | H | 1.97069400  | -1.96334800 | 2.07761800  |
| O                                | -0.15218800 | 0.51144700  | -1.76055800 | H | 1.00670100  | 2.29711400  | 3.85608900  |
| H                                | -0.28940100 | 2.19475500  | -0.24116900 | H | 2.04341300  | 0.87386000  | 3.85702500  |
| <b>TS<sub>3,4</sub></b>          |             |             |             | H | 1.82890600  | 3.12548500  | 1.83237400  |
| $G_{\text{solv}} = -4442.605177$ |             |             |             | H | 3.29338700  | 2.29964700  | 2.38817000  |
| Fe                               | -0.08595500 | 0.55233400  | 0.33337900  | H | -1.59165400 | 0.75081800  | 4.36113900  |
| P                                | 0.27568000  | -1.67182900 | 0.39230100  | H | -1.50697500 | 2.17495400  | 3.31010100  |
| P                                | 2.19352900  | 1.16217200  | 0.49558800  | H | -3.64797100 | 1.06134000  | 2.76196000  |
| P                                | -2.38887400 | 0.65226300  | 0.67182900  | H | -2.87612900 | -0.52805000 | 2.71699100  |
| P                                | 0.03097400  | 0.49168600  | 2.53908700  | H | -0.43992500 | -3.45705900 | -1.87756600 |
| C                                | 0.24511500  | -1.23391400 | 3.16727700  | H | -2.22854800 | -5.12041800 | -2.19661500 |
| C                                | 0.88440900  | -2.11885600 | 2.09176200  | H | -3.89763600 | -5.53125100 | -0.39781800 |
| C                                | 1.42476600  | 1.51123200  | 3.21372700  | H | -3.75470500 | -4.25217300 | 1.73229800  |
| C                                | 2.25134900  | 2.14347500  | 2.07700100  | H | -1.97303800 | -2.58966000 | 2.06515500  |
| C                                | -1.53390600 | 1.07702500  | 3.31445600  | H | 1.03648000  | -0.93853800 | -2.31326000 |
| C                                | -2.71986900 | 0.53830100  | 2.49938900  | H | 2.65322800  | -1.89235300 | -3.94227200 |
| C                                | -1.06943300 | -2.89682700 | 0.11747200  | H | 4.08687000  | -3.81810100 | -3.28992900 |
| C                                | -1.16167400 | -3.62189400 | -1.08101400 | H | 3.89648600  | -4.78497600 | -1.00756200 |
| C                                | -2.17418900 | -4.56578200 | -1.26411900 | H | 2.27976400  | -3.86081400 | 0.60559200  |
| C                                | -3.11074000 | -4.79626300 | -0.25526300 | H | 4.15757600  | 0.01203400  | -1.42891700 |
| C                                | -3.03061000 | -4.07871300 | 0.94099400  | H | 6.03480200  | -1.54819000 | -1.17514700 |
| C                                | -2.01900200 | -3.13530100 | 1.12525000  | H | 6.62077600  | -2.46269900 | 1.06570000  |
| C                                | 1.55762600  | -2.31847700 | -0.74003100 | H | 5.29506100  | -1.77419100 | 3.05783500  |
| C                                | 1.66883300  | -1.77862900 | -2.03042100 | H | 3.41760100  | -0.21653400 | 2.82169000  |
| C                                | 2.57557800  | -2.31821600 | -2.94564100 | H | 3.42434700  | 3.90247800  | 0.55645600  |
| C                                | 3.37994400  | -3.39923100 | -2.57957500 | H | 4.16121300  | 5.41323700  | -1.23602600 |
| C                                | 3.27350400  | -3.94314700 | -1.29643600 | H | 3.98850300  | 4.72105500  | -3.61775300 |
| C                                | 2.36246700  | -3.41170200 | -0.38163100 | H | 3.06052200  | 2.48350600  | -4.18963100 |
| C                                | 3.63091200  | 0.01758600  | 0.67319800  | H | 2.26816700  | 0.97619800  | -2.40420100 |
| C                                | 4.39189300  | -0.37311900 | -0.44046800 | H | -3.52457000 | 1.64839700  | -1.84360200 |
| C                                | 5.46095800  | -1.25902000 | -0.29892800 | H | -4.41432400 | 3.83127900  | -2.55727000 |
| C                                | 5.78929700  | -1.77262900 | 0.95720900  | H | -4.51777700 | 5.73109900  | -0.95228400 |
| C                                | 5.04517300  | -1.38829800 | 2.07373900  | H | -3.74416100 | 5.40773600  | 1.39051000  |
| C                                | 3.97697500  | -0.49941900 | 1.93388000  | H | -2.84845400 | 3.23893900  | 2.11513700  |
| C                                | 2.79042500  | 2.32217200  | -0.78963900 | H | -5.11096800 | -0.24028000 | 1.43887700  |
| C                                | 3.32732700  | 3.58064300  | -0.47653200 | H | -6.78842300 | -1.62692500 | 0.27646100  |
| C                                | 3.75188900  | 4.44061100  | -1.49325400 | H | -6.27333800 | -2.61561000 | -1.94568100 |
| C                                | 3.65710200  | 4.05087600  | -2.83011400 | H | -4.05260900 | -2.22423600 | -2.99229000 |
| C                                | 3.13624700  | 2.79483300  | -3.15160100 | H | -2.34736800 | -0.85456100 | -1.81743800 |
| C                                | 2.69969600  | 1.93970700  | -2.13970800 | H | -0.32130700 | 3.09999000  | 1.16226800  |
| C                                | -3.11173300 | 2.27750400  | 0.18913800  | H | -0.57019600 | 1.60618600  | -3.41188000 |
| C                                | -3.56471700 | 2.46709000  | -1.12767400 | C | -0.43259300 | 1.78260300  | -2.32221900 |
| C                                | -4.06773700 | 3.70304900  | -1.53576400 | O | -0.42120600 | 2.95004400  | -1.90250500 |
| C                                | -4.12711600 | 4.76884800  | -0.63459700 | O | -0.30160500 | 0.70562200  | -1.65137800 |
| C                                | -3.69096600 | 4.58826600  | 0.67940900  | H | -0.27545900 | 3.20618800  | 0.41862300  |

4

$G_{\text{solv}} = -4441.460976$

|    |             |             |             |
|----|-------------|-------------|-------------|
| Fe | 0.03628900  | 0.60872900  | -0.11456800 |
| P  | -0.16488500 | -1.62644300 | -0.40023500 |
| P  | -2.22894700 | 1.14919500  | -0.36864600 |
| P  | 2.31018800  | 0.73115700  | -0.37261800 |
| P  | -0.00759900 | 0.72580200  | -2.31181700 |
| C  | -0.46517200 | -0.90201800 | -3.08932200 |
| C  | -0.97425300 | -1.90653300 | -2.04694300 |
| C  | -1.22376000 | 1.99679000  | -2.88537400 |
| C  | -2.11231600 | 2.43860900  | -1.70270100 |
| C  | 1.65110500  | 1.09107700  | -3.03706000 |
| C  | 2.69772900  | 0.38870100  | -2.15835600 |
| C  | 1.26973000  | -2.77996500 | -0.43424300 |
| C  | 1.79895600  | -3.25582500 | 0.77747500  |
| C  | 2.87337000  | -4.14510100 | 0.78319400  |
| C  | 3.44185400  | -4.56748800 | -0.42183400 |
| C  | 2.93102400  | -4.09454000 | -1.63135700 |
| C  | 1.85034600  | -3.20798600 | -1.63834000 |
| C  | -1.25075000 | -2.49230100 | 0.79286000  |
| C  | -1.38088300 | -1.98958000 | 2.09548000  |
| C  | -2.20450600 | -2.63411900 | 3.02240000  |
| C  | -2.90056900 | -3.78735700 | 2.65524400  |
| C  | -2.75853800 | -4.30703600 | 1.36487300  |
| C  | -1.93326700 | -3.66737100 | 0.43900800  |
| C  | -3.57281800 | 0.03332000  | -0.94246700 |
| C  | -4.09464300 | -0.92909300 | -0.06023600 |
| C  | -5.07742100 | -1.82343700 | -0.48483500 |
| C  | -5.55008600 | -1.77624600 | -1.79901800 |
| C  | -5.04501800 | -0.82030800 | -2.68147400 |
| C  | -4.06648600 | 0.08186700  | -2.25634600 |
| C  | -3.03784300 | 2.02099800  | 1.02947100  |
| C  | -3.66499300 | 3.26641200  | 0.86341800  |
| C  | -4.26528200 | 3.90657200  | 1.95035400  |
| C  | -4.25167200 | 3.31104600  | 3.21314100  |
| C  | -3.63548100 | 2.06960300  | 3.38781000  |
| C  | -3.02849800 | 1.43055600  | 2.30493600  |
| C  | 3.05351800  | 2.40717800  | -0.15778400 |
| C  | 4.26887100  | 2.59888000  | 0.51990600  |
| C  | 4.84014300  | 3.87137100  | 0.61339700  |
| C  | 4.21123400  | 4.96916800  | 0.02624600  |
| C  | 3.00040600  | 4.79288200  | -0.64855600 |
| C  | 2.42284900  | 3.52600900  | -0.73381700 |
| C  | 3.44674400  | -0.31146300 | 0.59899000  |
| C  | 4.59188300  | -0.90380500 | 0.04723000  |
| C  | 5.47331700  | -1.62013900 | 0.86117900  |
| C  | 5.22739600  | -1.73657500 | 2.23110600  |
| C  | 4.08921000  | -1.14747500 | 2.78798600  |
| C  | 3.19915600  | -0.44430000 | 1.97571400  |
| H  | 0.43994000  | -1.27812600 | -3.58577600 |
| H  | -1.21460600 | -0.73519500 | -3.87386300 |
| H  | -0.82709200 | -2.93936100 | -2.38622000 |
| H  | -2.05019200 | -1.76830200 | -1.87894800 |
| H  | -0.66768500 | 2.85672400  | -3.27994300 |
| H  | -1.81607100 | 1.58733100  | -3.71270200 |
| H  | -1.65234200 | 3.30566900  | -1.21177100 |

|   |             |             |             |
|---|-------------|-------------|-------------|
| H | -3.10805500 | 2.74417000  | -2.04739900 |
| H | 1.70433200  | 0.74680700  | -4.07746800 |
| H | 1.80246100  | 2.17786600  | -3.03763200 |
| H | 3.71394900  | 0.71925000  | -2.40769200 |
| H | 2.64707000  | -0.70149900 | -2.29881300 |
| H | 1.36618500  | -2.93457800 | 1.72368900  |
| H | 3.26816000  | -4.50584000 | 1.72915200  |
| H | 4.27694800  | -5.26200400 | -0.41651100 |
| H | 3.36451700  | -4.41980100 | -2.57282500 |
| H | 1.46239200  | -2.86368400 | -2.59373800 |
| H | -0.84244200 | -1.08728300 | 2.37892200  |
| H | -2.30427800 | -2.23189400 | 4.02683700  |
| H | -3.54678200 | -4.28492000 | 3.37259700  |
| H | -3.29193300 | -5.20927100 | 1.07920700  |
| H | -1.82850700 | -4.08402300 | -0.56087500 |
| H | -3.72297700 | -0.99638600 | 0.96029700  |
| H | -5.46727700 | -2.56134800 | 0.21100900  |
| H | -6.31054700 | -2.47709200 | -2.13039800 |
| H | -5.41295600 | -0.77020400 | -3.70220000 |
| H | -3.69214500 | 0.81662100  | -2.96307400 |
| H | -3.69315600 | 3.74750500  | -0.11012400 |
| H | -4.74461100 | 4.87069500  | 1.80700100  |
| H | -4.71853600 | 3.81124100  | 4.05650900  |
| H | -3.62076400 | 1.59955600  | 4.36696100  |
| H | -2.53563400 | 0.47285100  | 2.45799200  |
| H | 4.77994000  | 1.75663400  | 0.97950400  |
| H | 5.77909900  | 3.99879300  | 1.14461100  |
| H | 4.65709800  | 5.95691600  | 0.09785600  |
| H | 2.49805600  | 5.64363900  | -1.10006900 |
| H | 1.45970900  | 3.41601600  | -1.22576400 |
| H | 4.80711300  | -0.80723300 | -1.01446200 |
| H | 6.35471700  | -2.08122800 | 0.42427800  |
| H | 5.91931900  | -2.28701400 | 2.86207400  |
| H | 3.89185500  | -1.24096100 | 3.85207800  |
| H | 2.30722400  | 0.00770600  | 2.40756800  |
| C | 0.09397300  | 2.12076100  | 1.77897600  |
| H | 0.11893700  | 2.81893900  | 2.63094200  |
| O | 0.14258600  | 0.87558700  | 1.96797100  |
| O | 0.01283500  | 2.56432000  | 0.59899000  |

**TS<sub>4,5</sub>**

$G_{\text{solv}} = -4441.447736$

|    |             |             |             |
|----|-------------|-------------|-------------|
| Fe | 0.01336300  | 0.52318400  | -0.25826500 |
| P  | -0.11816900 | -1.69691900 | -0.37023400 |
| P  | -2.26756200 | 0.98459000  | -0.45671700 |
| P  | 2.26163900  | 0.70766300  | -0.53715000 |
| P  | -0.08275800 | 0.43387400  | -2.43293000 |
| C  | -0.53956700 | -1.25005200 | -3.08066700 |
| C  | -0.97806600 | -2.18147400 | -1.93986200 |
| C  | -1.33786200 | 1.65146000  | -3.04538900 |
| C  | -2.18462000 | 2.18469800  | -1.87080000 |
| C  | 1.54732100  | 0.82105700  | -3.21053900 |
| C  | 2.65401200  | 0.27189600  | -2.29889100 |
| C  | 1.35793500  | -2.79175700 | -0.33423900 |
| C  | 1.90842100  | -3.17814900 | 0.89921300  |
| C  | 3.02111600  | -4.01840900 | 0.94789500  |

|   |             |             |             |                                  |             |             |             |
|---|-------------|-------------|-------------|----------------------------------|-------------|-------------|-------------|
| C | 3.60524000  | -4.47974900 | -0.23455100 | H                                | -5.39206300 | -2.71577300 | 0.51409200  |
| C | 3.07187800  | -4.09614700 | -1.46625800 | H                                | -6.28864600 | -2.86511300 | -1.80370000 |
| C | 1.95489200  | -3.25855500 | -1.51652500 | H                                | -5.47814100 | -1.28523800 | -3.54477200 |
| C | -1.10615800 | -2.37078000 | 1.00501700  | H                                | -3.77810000 | 0.40311200  | -2.99733900 |
| C | -1.12731100 | -1.65720100 | 2.21166700  | H                                | -4.46830900 | 2.96085600  | -0.43044900 |
| C | -1.87523200 | -2.12315100 | 3.29481100  | H                                | -5.61617700 | 4.15950300  | 1.39314200  |
| C | -2.60127000 | -3.31079000 | 3.17696100  | H                                | -4.94046700 | 3.79016900  | 3.75712800  |
| C | -2.56751400 | -4.03825000 | 1.98302600  | H                                | -3.09145400 | 2.21178200  | 4.28412600  |
| C | -1.81914600 | -3.57388500 | 0.89992500  | H                                | -1.90639300 | 1.03552600  | 2.45651500  |
| C | -3.58716800 | -0.20009800 | -0.92148000 | H                                | 4.59541400  | 2.04531800  | 0.77127400  |
| C | -4.06612300 | -1.08464800 | 0.06082500  | H                                | 5.28628300  | 4.40480700  | 0.93148000  |
| C | -5.03454800 | -2.03710100 | -0.25546700 | H                                | 3.93638000  | 6.18652200  | -0.15956300 |
| C | -5.53807500 | -2.12012200 | -1.55672600 | H                                | 1.87144200  | 5.57913200  | -1.40861900 |
| C | -5.08099600 | -1.23572100 | -2.53504800 | H                                | 1.13472100  | 3.23573100  | -1.52438500 |
| C | -4.11404200 | -0.27718000 | -2.22002000 | H                                | 4.86084900  | -0.67417600 | -1.10832100 |
| C | -3.09574000 | 1.91766900  | 0.88576000  | H                                | 6.48482600  | -1.77971300 | 0.38464100  |
| C | -4.14978400 | 2.79986200  | 0.59721900  | H                                | 6.05967800  | -1.90259500 | 2.82957200  |
| C | -4.80621400 | 3.47499900  | 1.62812200  | H                                | 3.97304300  | -0.93586200 | 3.77623900  |
| C | -4.42669200 | 3.26636400  | 2.95636600  | H                                | 2.31801000  | 0.15271200  | 2.28066900  |
| C | -3.38813800 | 2.38095300  | 3.25291300  | C                                | 0.59276800  | 2.66445600  | 1.83361500  |
| C | -2.72338400 | 1.71289800  | 2.22227300  | H                                | 0.71485200  | 3.76477000  | 1.74230900  |
| C | 2.82827400  | 2.45481100  | -0.41261900 | O                                | 0.99222100  | 2.09180200  | 2.85575500  |
| C | 3.99258400  | 2.80985700  | 0.28718100  | O                                | 0.00342900  | 2.11527700  | 0.84416400  |
| C | 4.38617500  | 4.14792600  | 0.38047100  |                                  |             |             |             |
| C | 3.62882600  | 5.14744200  | -0.23163700 | <b>5</b>                         |             |             |             |
| C | 2.46986100  | 4.80620900  | -0.93485900 | G <sub>solv</sub> = -4441.452193 |             |             |             |
| C | 2.06741900  | 3.47311800  | -1.01687600 | Fe                               | 0.05016000  | 0.46062300  | -0.28850100 |
| C | 3.47301000  | -0.18820700 | 0.48536100  | P                                | -0.23826100 | -1.73691300 | -0.39382600 |
| C | 4.65235100  | -0.73315700 | -0.04272700 | P                                | -2.17218500 | 1.11643400  | -0.51603100 |
| C | 5.57602800  | -1.35502400 | 0.80161800  | P                                | 2.31786100  | 0.61795700  | -0.57932300 |
| C | 5.33618600  | -1.42392800 | 2.17593400  | P                                | 0.00156700  | 0.42052600  | -2.49773500 |
| C | 4.16438100  | -0.87976800 | 2.70847600  | C                                | -0.34496700 | -1.27945100 | -3.14889100 |
| C | 3.23312800  | -0.27136300 | 1.86681100  | C                                | -0.94597600 | -2.16637000 | -2.05102700 |
| H | 0.34876300  | -1.64321500 | -3.59337800 | C                                | -1.26712300 | 1.58666700  | -3.17073600 |
| H | -1.32979700 | -1.15044400 | -3.83547600 | C                                | -2.08507600 | 2.20594300  | -2.01988600 |
| H | -0.79269000 | -3.23456300 | -2.18337300 | C                                | 1.63895100  | 0.86276300  | -3.22816100 |
| H | -2.05410400 | -2.06934600 | -1.75073800 | C                                | 2.73293100  | 0.24483400  | -2.34585700 |
| H | -0.80918700 | 2.47799200  | -3.53630500 | C                                | 1.24975700  | -2.79003700 | -0.20969900 |
| H | -1.95835800 | 1.16737300  | -3.80937200 | C                                | 1.79600100  | -2.95986500 | 1.07478200  |
| H | -1.70515800 | 3.07654600  | -1.44339800 | C                                | 2.92382700  | -3.75680100 | 1.26466600  |
| H | -3.18453300 | 2.48282500  | -2.20978600 | C                                | 3.53113800  | -4.38345500 | 0.17260800  |
| H | 1.60564900  | 0.39059100  | -4.21795200 | C                                | 3.00445900  | -4.21109100 | -1.10825700 |
| H | 1.62751300  | 1.91111400  | -3.30941500 | C                                | 1.86802000  | -3.41981600 | -1.30029500 |
| H | 3.63635700  | 0.66546200  | -2.58904700 | C                                | -1.38170700 | -2.50610800 | 0.80943400  |
| H | 2.69259500  | -0.82545800 | -2.35812800 | C                                | -1.54453600 | -1.93255200 | 2.07929600  |
| H | 1.46292800  | -2.82895700 | 1.82879200  | C                                | -2.39875400 | -2.52125000 | 3.01450200  |
| H | 3.43187100  | -4.31099700 | 1.91026800  | C                                | -3.09630500 | -3.68607200 | 2.68930600  |
| H | 4.46978300  | -5.13597100 | -0.19522800 | C                                | -2.92985800 | -4.26999700 | 1.43009100  |
| H | 3.51687200  | -4.45354800 | -2.39041500 | C                                | -2.07349900 | -3.68734000 | 0.49442200  |
| H | 1.55019200  | -2.98492200 | -2.48734700 | C                                | -3.57706600 | -0.02028700 | -0.84735700 |
| H | -0.55610400 | -0.73158700 | 2.29738900  | C                                | -4.16955200 | -0.72317400 | 0.21547500  |
| H | -1.89293600 | -1.55972100 | 4.22360900  | C                                | -5.19264600 | -1.64116600 | -0.02241900 |
| H | -3.18894500 | -3.67317100 | 4.01535500  | C                                | -5.63573100 | -1.87736100 | -1.32628300 |
| H | -3.12707000 | -4.96511200 | 1.89470900  | C                                | -5.06181800 | -1.17766000 | -2.38869500 |
| H | -1.80030500 | -4.14418700 | -0.02711700 | C                                | -4.04174800 | -0.25257000 | -2.15228600 |
| H | -3.67389500 | -1.03576700 | 1.07562100  | C                                | -2.83683500 | 2.21176200  | 0.79377200  |

|   |             |             |             |                                  |             |             |             |
|---|-------------|-------------|-------------|----------------------------------|-------------|-------------|-------------|
| C | -3.40809200 | 3.46160500  | 0.50267000  | H                                | 6.34897400  | -1.73153800 | 2.71279600  |
| C | -3.90245300 | 4.26927600  | 1.52993900  | H                                | 4.43658100  | -0.50383200 | 3.72494200  |
| C | -3.83913600 | 3.83805000  | 2.85632800  | H                                | 2.68586400  | 0.47825500  | 2.27721700  |
| C | -3.27930200 | 2.59381200  | 3.15598400  | C                                | 0.31682000  | 1.83724000  | 2.24841100  |
| C | -2.77708600 | 1.78782600  | 2.13332000  | H                                | 0.19781900  | 2.72124200  | 1.58129100  |
| C | 2.73702300  | 2.40544500  | -0.44471000 | O                                | 0.52823700  | 2.02316500  | 3.45718300  |
| C | 4.04902800  | 2.82142000  | -0.16281200 | O                                | 0.23016600  | 0.69330000  | 1.68918100  |
| C | 4.36315900  | 4.17968600  | -0.09020400 |                                  |             |             |             |
| C | 3.37205100  | 5.14181200  | -0.29728500 |                                  |             |             |             |
| C | 2.06486100  | 4.74253200  | -0.58305300 | <b>TS<sub>5,6</sub></b>          |             |             |             |
| C | 1.74898800  | 3.38411000  | -0.65687600 | G <sub>solv</sub> = -4441.441405 |             |             |             |
| C | 3.60561000  | -0.17875900 | 0.43174400  | Fe                               | 0.02755600  | 0.50978800  | -0.19353100 |
| C | 4.68536900  | -0.87305800 | -0.13241200 | P                                | -0.22822400 | -1.70742700 | -0.36536200 |
| C | 5.66720000  | -1.43261000 | 0.69027700  | P                                | -2.22470200 | 1.12772300  | -0.43769400 |
| C | 5.58217600  | -1.29882800 | 2.07685900  | P                                | 2.30328200  | 0.61942800  | -0.50022800 |
| C | 4.50810300  | -0.60805900 | 2.64620800  | P                                | -0.03775100 | 0.53470500  | -2.40126100 |
| C | 3.52368000  | -0.05377500 | 1.83010400  | C                                | -0.48211200 | -1.13225600 | -3.08814400 |
| H | 0.61288400  | -1.68284400 | -3.50471900 | C                                | -1.02771000 | -2.06365300 | -1.99823500 |
| H | -1.01286000 | -1.21813000 | -4.01740800 | C                                | -1.27451800 | 1.76206800  | -3.02326300 |
| H | -0.81425000 | -3.23125600 | -2.27921400 | C                                | -2.06876300 | 2.33850300  | -1.83508700 |
| H | -2.02645500 | -1.97971400 | -1.96510900 | C                                | 1.61048900  | 0.89097500  | -3.15538200 |
| H | -0.75288500 | 2.37602700  | -3.73366800 | C                                | 2.67766400  | 0.22488700  | -2.27369600 |
| H | -1.90316400 | 1.04900200  | -3.88380100 | C                                | 1.23147500  | -2.81674600 | -0.31669600 |
| H | -1.58240000 | 3.12045500  | -1.67534000 | C                                | 1.78835500  | -3.14514800 | 0.93124700  |
| H | -3.08960700 | 2.49318100  | -2.35651100 | C                                | 2.88541600  | -4.00165700 | 1.01323400  |
| H | 1.70897300  | 0.51089700  | -4.26516900 | C                                | 3.45073800  | -4.53026500 | -0.15088600 |
| H | 1.71816100  | 1.95838700  | -3.23740900 | C                                | 2.91310400  | -4.20039600 | -1.39583800 |
| H | 3.72586300  | 0.63486900  | -2.60402000 | C                                | 1.80702400  | -3.34977600 | -1.48009500 |
| H | 2.75189600  | -0.84938000 | -2.46206700 | C                                | -1.31326700 | -2.50725100 | 0.87045900  |
| H | 1.33421100  | -2.47210500 | 1.93224300  | C                                | -1.43442200 | -1.95444100 | 2.15363900  |
| H | 3.33319400  | -3.88172100 | 2.26325800  | C                                | -2.25970700 | -2.55730700 | 3.10630500  |
| H | 4.41175700  | -5.00187200 | 0.32085700  | C                                | -2.96576000 | -3.71815100 | 2.78551500  |
| H | 3.47028800  | -4.69709300 | -1.96073000 | C                                | -2.83249500 | -4.28701500 | 1.51540400  |
| H | 1.46965100  | -3.31032600 | -2.30553500 | C                                | -2.00642200 | -3.68922100 | 0.56264200  |
| H | -1.00457600 | -1.02030600 | 2.32696800  | C                                | -3.61780400 | 0.03401800  | -0.91511200 |
| H | -2.52202900 | -2.06582800 | 3.99319200  | C                                | -4.11306700 | -0.90506500 | 0.00656000  |
| H | -3.76512200 | -4.14104900 | 3.41417400  | C                                | -5.13832400 | -1.77963500 | -0.35417300 |
| H | -3.46696000 | -5.17915200 | 1.17533600  | C                                | -5.67789800 | -1.73731100 | -1.64226900 |
| H | -1.95144000 | -4.15739700 | -0.47896400 | C                                | -5.19959600 | -0.80325600 | -2.56215500 |
| H | -3.83095400 | -0.56321900 | 1.23616000  | C                                | -4.18049800 | 0.08131600  | -2.20092200 |
| H | -5.63946100 | -2.17368400 | 0.81257600  | C                                | -2.90419300 | 2.11816200  | 0.94739500  |
| H | -6.42842400 | -2.59618100 | -1.51123700 | C                                | -3.32093600 | 3.44820300  | 0.77666100  |
| H | -5.40785300 | -1.34517000 | -3.40451100 | C                                | -3.78027900 | 4.18992000  | 1.86819900  |
| H | -3.61606000 | 0.27955900  | -2.99785000 | C                                | -3.83483900 | 3.61289500  | 3.13806000  |
| H | -3.47742600 | 3.81460900  | -0.52236200 | C                                | -3.43048900 | 2.28732500  | 3.31662100  |
| H | -4.33977100 | 5.23407800  | 1.28999200  | C                                | -2.96303800 | 1.54639000  | 2.23116900  |
| H | -4.22350200 | 4.46824000  | 3.65283100  | C                                | 2.91651200  | 2.35735600  | -0.37203800 |
| H | -3.22450000 | 2.25213900  | 4.18571000  | C                                | 4.18259800  | 2.64775100  | 0.16343100  |
| H | -2.32262900 | 0.83108700  | 2.38284900  | C                                | 4.64726500  | 3.96400700  | 0.22087200  |
| H | 4.82964900  | 2.08197800  | 0.00364700  | C                                | 3.85902400  | 5.01012100  | -0.26001500 |
| H | 5.38204300  | 4.48491600  | 0.12960200  | C                                | 2.60053600  | 4.73562400  | -0.79975600 |
| H | 3.61720500  | 6.19798400  | -0.23637600 | C                                | 2.13110100  | 3.42231000  | -0.85195200 |
| H | 1.28944900  | 5.48511900  | -0.74760400 | C                                | 3.51181200  | -0.29128000 | 0.50898200  |
| H | 0.72037200  | 3.10001500  | -0.88344800 | C                                | 4.61328600  | -0.95920800 | -0.04362700 |
| H | 4.77342400  | -0.98121100 | -1.21048000 | C                                | 5.54838100  | -1.57727700 | 0.79120500  |
| H | 6.49867000  | -1.97063900 | 0.24374700  | C                                | 5.39508900  | -1.52494300 | 2.17792900  |
|   |             |             |             | C                                | 4.29836300  | -0.86062600 | 2.73500500  |



|                                  |             |             |             |   |             |             |             |
|----------------------------------|-------------|-------------|-------------|---|-------------|-------------|-------------|
| C                                | 3.35874900  | -0.24952800 | 1.90587700  | C | 1.04090400  | -2.03801600 | 2.01261900  |
| H                                | 0.43332100  | -1.54348300 | -3.53510200 | C | 1.15742500  | 1.81492800  | 3.02905700  |
| H                                | -1.20879800 | -1.01113200 | -3.90153000 | C | 2.00249900  | 2.37033700  | 1.86541600  |
| H                                | -0.90488800 | -3.11753400 | -2.27652800 | C | -1.69480600 | 0.83533300  | 3.11204100  |
| H                                | -2.10206700 | -1.88564800 | -1.85028700 | C | -2.71879500 | 0.13542200  | 2.20571800  |
| H                                | -0.74338700 | 2.56638300  | -3.54753700 | C | -1.17150700 | -2.86746000 | 0.31151700  |
| H                                | -1.92769200 | 1.27344000  | -3.75584000 | C | -1.69508100 | -3.23847200 | -0.93874400 |
| H                                | -1.50869200 | 3.18359900  | -1.41035900 | C | -2.76557600 | -4.12798200 | -1.02257600 |
| H                                | -3.04773100 | 2.72088500  | -2.15119000 | C | -3.33578200 | -4.65087100 | 0.14171500  |
| H                                | 1.65281200  | 0.52085700  | -4.18725600 | C | -2.83097300 | -4.27980900 | 1.38881100  |
| H                                | 1.74885200  | 1.97955000  | -3.18435700 | C | -1.75321100 | -3.39377700 | 1.47487400  |
| H                                | 3.68580300  | 0.56722500  | -2.53941400 | C | 1.37206900  | -2.47555800 | -0.85453000 |
| H                                | 2.64611700  | -0.86872400 | -2.38634300 | C | 1.50024500  | -1.90420400 | -2.12868800 |
| H                                | 1.35667700  | -2.73606900 | 1.84375900  | C | 2.35374900  | -2.47603200 | -3.07563400 |
| H                                | 3.30210000  | -4.25194800 | 1.98488100  | C | 3.08109900  | -3.62437100 | -2.75714100 |
| H                                | 4.30591900  | -5.19674000 | -0.08607400 | C | 2.94075300  | -4.21228900 | -1.49635900 |
| H                                | 3.34568500  | -4.61008400 | -2.30404500 | C | 2.08617700  | -3.64552400 | -0.54976800 |
| H                                | 1.39657300  | -3.11818800 | -2.45950500 | C | 3.58857800  | 0.07314800  | 0.99431600  |
| H                                | -0.89087900 | -1.04590700 | 2.40198500  | C | 4.13910300  | -0.84069400 | 0.07877200  |
| H                                | -2.35317000 | -2.11608100 | 4.09470400  | C | 5.16311400  | -1.70398100 | 0.46899300  |
| H                                | -3.61312900 | -4.18319000 | 3.52324100  | C | 5.64579800  | -1.67526800 | 1.77993300  |
| H                                | -3.37336800 | -5.19524600 | 1.26551700  | C | 5.11107000  | -0.76693900 | 2.69457200  |
| H                                | -1.91085500 | -4.14492100 | -0.42068700 | C | 4.09273300  | 0.10618100  | 2.30459700  |
| H                                | -3.69115100 | -0.96986600 | 1.00698100  | C | 2.90997800  | 2.14107800  | -0.89057600 |
| H                                | -5.50842700 | -2.49878500 | 0.37132300  | C | 3.36185300  | 3.45677300  | -0.69835900 |
| H                                | -6.46972000 | -2.42476800 | -1.92440700 | C | 3.85406900  | 4.19864500  | -1.77510200 |
| H                                | -5.62084200 | -0.75528700 | -3.56202600 | C | 3.90751200  | 3.63567100  | -3.05140800 |
| H                                | -3.83504200 | 0.80415300  | -2.93347700 | C | 3.47047200  | 2.32367400  | -3.25077800 |
| H                                | -3.29341000 | 3.91818700  | -0.20211800 | C | 2.97039300  | 1.58259300  | -2.17987700 |
| H                                | -4.09704400 | 5.21841800  | 1.72176200  | C | -3.01775300 | 2.26542700  | 0.31021600  |
| H                                | -4.19027700 | 4.19247400  | 3.98483700  | C | -4.28267500 | 2.49720800  | -0.25578400 |
| H                                | -3.46945300 | 1.83205100  | 4.30188300  | C | -4.81346300 | 3.78831200  | -0.30981400 |
| H                                | -2.62390500 | 0.52518300  | 2.39197500  | C | -4.09382000 | 4.86689300  | 0.20559300  |
| H                                | 4.81332400  | 1.84769600  | 0.54293600  | C | -2.83639700 | 4.65078200  | 0.77368700  |
| H                                | 5.62687800  | 4.16791100  | 0.64331200  | C | -2.30018100 | 3.36319700  | 0.82144100  |
| H                                | 4.22083400  | 6.03290900  | -0.21304400 | C | -3.46407200 | -0.40448400 | -0.59835300 |
| H                                | 1.97908300  | 5.54305300  | -1.17615900 | C | -4.57559000 | -1.08431000 | -0.08149400 |
| H                                | 1.13860900  | 3.24045700  | -1.26074000 | C | -5.45564000 | -1.74414200 | -0.94349500 |
| H                                | 4.75383900  | -0.99830300 | -1.12114100 | C | -5.23840500 | -1.71993300 | -2.32263200 |
| H                                | 6.39764000  | -2.09599100 | 0.35550200  | C | -4.13173600 | -1.04355000 | -2.84408700 |
| H                                | 6.12734700  | -2.00108400 | 2.82347700  | C | -3.24513000 | -0.39257500 | -1.98689400 |
| H                                | 4.17514200  | -0.82002500 | 3.81334400  | H | -0.42410900 | -1.53451200 | 3.55156600  |
| H                                | 2.50539000  | 0.26896800  | 2.34094100  | H | 1.20590000  | -0.95035800 | 3.89597200  |
| C                                | 0.19936400  | 2.04954000  | 1.59942200  | H | 0.92887500  | -3.09106300 | 2.29868400  |
| H                                | 0.08284100  | 2.33170500  | 0.47844100  | H | 2.11382100  | -1.84889100 | 1.87228700  |
| O                                | 0.37253100  | 3.00252300  | 2.35482600  | H | 0.58133500  | 2.62384300  | 3.49542200  |
| O                                | 0.12526200  | 0.81037800  | 1.82759700  | H | 1.77966000  | 1.36708300  | 3.81289600  |
| <b>6</b>                         |             |             |             | H | 1.47159900  | 3.22064500  | 1.41449600  |
| G <sub>solv</sub> = -4441.443240 |             |             |             | H | 2.97431900  | 2.74090500  | 2.21546200  |
| Fe                               | -0.04416300 | 0.51065000  | 0.18017100  | H | -1.74288800 | 0.45681000  | 4.14047200  |
| P                                | 0.25100000  | -1.70920100 | 0.36927100  | H | -1.87429500 | 1.91771100  | 3.14504100  |
| P                                | 2.19671200  | 1.15088700  | 0.47785000  | H | -3.74417200 | 0.43599300  | 2.45517300  |
| P                                | -2.32562200 | 0.55828200  | 0.44318300  | H | -2.64585900 | -0.95718700 | 2.30979500  |
| P                                | -0.02128500 | 0.54314600  | 2.38710100  | H | -1.25993400 | -2.83533800 | -1.85197900 |
| C                                | 0.47585700  | -1.10430800 | 3.09104400  | H | -3.15881900 | -4.40675600 | -1.99634400 |
|                                  |             |             |             | H | -4.16933700 | -5.34406600 | 0.07556100  |



|                                  |             |             |             |   |             |             |             |
|----------------------------------|-------------|-------------|-------------|---|-------------|-------------|-------------|
| H                                | 2.54611000  | 0.68912800  | -2.38673500 | C | -4.08915200 | 5.00253100  | -0.14791300 |
| H                                | -4.79664300 | 1.68309800  | -0.80245300 | C | -2.79624000 | 4.85477200  | 0.35543000  |
| H                                | -5.80151400 | 3.92344300  | -0.93635800 | C | -2.24468200 | 3.58137600  | 0.51415000  |
| H                                | -4.64950300 | 5.88335400  | 0.07424200  | C | -3.46853700 | -0.28625300 | -0.45117400 |
| H                                | -2.45818700 | 5.56970300  | 1.21290700  | C | -4.49836100 | -1.03267800 | 0.13855000  |
| H                                | -1.41400800 | 3.34184700  | 1.30665700  | C | -5.40765300 | -1.73506600 | -0.65884000 |
| H                                | -4.73731400 | -0.95096300 | 1.05417700  | C | -5.30371000 | -1.69149100 | -2.04986100 |
| H                                | -6.27986800 | -2.19991000 | -0.40778000 | C | -4.27856200 | -0.95205100 | -2.64756700 |
| H                                | -5.88139400 | -2.30216600 | -2.85883200 | C | -3.36472200 | -0.26135600 | -1.85345400 |
| H                                | -3.89136500 | -1.17507100 | -3.83766200 | H | -0.97992400 | -1.70408700 | 3.27353700  |
| H                                | -2.31385900 | 0.04543700  | -2.37785600 | H | 0.47875700  | -1.29609800 | 4.19116200  |
| H                                | -0.09347100 | 2.09871900  | 0.29029200  | H | 0.87844700  | -3.17951900 | 2.44217400  |
| C                                | -0.19876200 | 2.02745700  | -1.69062200 | H | 1.92476000  | -1.76145700 | 2.22802600  |
| O                                | -0.09284200 | 0.85884200  | -1.91282300 | H | 0.95253100  | 1.98569700  | 4.11417300  |
| O                                | -0.32270000 | 3.17882400  | -1.88412000 | H | 1.96324400  | 0.56885200  | 3.79601300  |
| <b>7</b>                         |             |             |             | H | 1.61458200  | 3.08104300  | 2.07685800  |
| $G_{\text{solv}} = -4441.433754$ |             |             |             | H | 3.13650200  | 2.30675800  | 2.54719800  |
| Fe                               | -0.03891500 | 0.48319700  | 0.37088800  | H | -1.82373600 | 0.77393800  | 4.23391100  |
| P                                | 0.28528300  | -1.78312000 | 0.46702900  | H | -1.65271200 | 2.16217200  | 3.13423500  |
| P                                | 2.03124000  | 1.26376000  | 0.59354500  | H | -3.75671500 | 0.95345400  | 2.47322800  |
| P                                | -2.27971600 | 0.73333200  | 0.50124300  | H | -2.87611300 | -0.59071200 | 2.44953700  |
| P                                | -0.08465500 | 0.42332500  | 2.52843200  | H | -1.31526200 | -2.52361800 | -1.84302600 |
| C                                | 0.03703000  | -1.29803600 | 3.18630000  | H | -3.14035200 | -4.13333900 | -2.22795800 |
| C                                | 0.87921600  | -2.11008700 | 2.19686700  | H | -4.04103400 | -5.48487100 | -0.34084400 |
| C                                | 1.32495700  | 1.32572500  | 3.32034100  | H | -3.07952600 | -5.21121100 | 1.93757800  |
| C                                | 2.09703900  | 2.10934700  | 2.25267800  | H | -1.22573400 | -3.64968600 | 2.32627400  |
| C                                | -1.68006100 | 1.06459800  | 3.18526100  | H | 0.87106400  | -1.68141800 | -2.38679300 |
| C                                | -2.77972800 | 0.49210700  | 2.27961400  | H | 2.43226400  | -2.89813400 | -3.86132700 |
| C                                | -1.12188800 | -2.96645700 | 0.26922300  | H | 4.00240200  | -4.57618700 | -2.90458600 |
| C                                | -1.68837300 | -3.11699300 | -1.00936800 | H | 3.98811000  | -5.02304700 | -0.45814600 |
| C                                | -2.72320000 | -4.02459200 | -1.23043800 | H | 2.42022800  | -3.83354900 | 1.01652100  |
| C                                | -3.23069200 | -4.78185500 | -0.17032700 | H | 3.47169400  | 0.05066800  | -1.62214100 |
| C                                | -2.69208800 | -4.62764100 | 1.10698300  | H | 5.41104600  | -1.47123400 | -1.77007500 |
| C                                | -1.63997300 | -3.73143200 | 1.32525300  | H | 6.55844000  | -2.24356200 | 0.29904600  |
| C                                | 1.52709700  | -2.66131000 | -0.57531000 | H | 5.75586700  | -1.46252500 | 2.52008900  |
| C                                | 1.55129600  | -2.41299500 | -1.95786800 | H | 3.85040400  | 0.08838800  | 2.67944300  |
| C                                | 2.43172600  | -3.10096600 | -2.79398400 | H | 4.66126700  | 2.44723300  | -0.10009000 |
| C                                | 3.31234800  | -4.04294200 | -2.25706700 | H | 5.32058200  | 4.41195600  | -1.43940800 |
| C                                | 3.30361000  | -4.29412700 | -0.88347800 | H | 3.59592100  | 5.76548300  | -2.61366400 |
| C                                | 2.41343300  | -3.61401500 | -0.04801600 | H | 1.19334600  | 5.15001300  | -2.40740000 |
| C                                | 3.52023500  | 0.18988500  | 0.53903100  | H | 0.52256600  | 3.20078700  | -1.04183000 |
| C                                | 3.97213200  | -0.27395100 | -0.70960400 | H | -4.88443400 | 1.72610800  | -0.57193500 |
| C                                | 5.06539000  | -1.13437800 | -0.79649100 | H | -5.84045600 | 3.96919100  | -0.86852500 |
| C                                | 5.71000400  | -1.56860800 | 0.36641600  | H | -4.51596400 | 5.99263200  | -0.27922400 |
| C                                | 5.25924700  | -1.13113400 | 1.61241900  | H | -2.21081800 | 5.73002700  | 0.62327400  |
| C                                | 4.17437600  | -0.25205100 | 1.69860300  | H | -1.23256000 | 3.48571800  | 0.90098900  |
| C                                | 2.54363500  | 2.66351500  | -0.49386700 | H | -4.61212800 | -1.06301100 | 1.21912100  |
| C                                | 3.89574900  | 3.03102000  | -0.60682300 | H | -6.20108400 | -2.30999400 | -0.18918600 |
| C                                | 4.27105300  | 4.14192500  | -1.36409700 | H | -6.01690000 | -2.23090300 | -2.66656200 |
| C                                | 3.30192200  | 4.90431700  | -2.02079000 | H | -4.19178400 | -0.91492500 | -3.72987000 |
| C                                | 1.95441100  | 4.55816500  | -1.90651000 | H | -2.57410500 | 0.32007000  | -2.32574400 |
| C                                | 1.57769900  | 3.44885000  | -1.14458400 | H | -0.13139600 | 1.99505200  | 0.54107600  |
| C                                | -2.97462000 | 2.42807700  | 0.17861400  | C | 0.40850900  | 1.00694500  | -2.81999600 |
| C                                | -4.28301700 | 2.59386300  | -0.31270700 | O | 0.81719700  | 1.31022500  | -3.86494500 |
| C                                | -4.83106000 | 3.86742600  | -0.47975200 | O | -0.01552000 | 0.68770000  | -1.78343500 |

**8**

$G_{\text{solv}} = -4442.174822$

|    |             |             |             |
|----|-------------|-------------|-------------|
| Fe | 0.04963700  | 0.53373400  | -0.34871800 |
| P  | -0.33750000 | -1.70528500 | -0.40237100 |
| P  | -2.05374400 | 1.28754100  | -0.57266600 |
| P  | 2.29606000  | 0.64452000  | -0.54751700 |
| P  | 0.03855200  | 0.45951600  | -2.50617800 |
| C  | -0.24174200 | -1.25316700 | -3.17040100 |
| C  | -0.95954800 | -2.10026200 | -2.11285800 |
| C  | -1.24690400 | 1.55392900  | -3.27340900 |
| C  | -2.05744900 | 2.25538800  | -2.16831800 |
| C  | 1.67521500  | 0.94002400  | -3.21271800 |
| C  | 2.73956000  | 0.28804900  | -2.32113800 |
| C  | 0.98114300  | -2.97107700 | -0.13571300 |
| C  | 1.41815100  | -3.21951800 | 1.17794800  |
| C  | 2.40475500  | -4.17124000 | 1.43375600  |
| C  | 2.98184000  | -4.88501000 | 0.37851700  |
| C  | 2.57182700  | -4.63333600 | -0.93111800 |
| C  | 1.57835500  | -3.68218400 | -1.18783500 |
| C  | -1.64720700 | -2.42137000 | 0.67835200  |
| C  | -1.83432200 | -1.87956300 | 1.96030100  |
| C  | -2.79666600 | -2.41045200 | 2.82263600  |
| C  | -3.59383800 | -3.47957400 | 2.40848700  |
| C  | -3.41876900 | -4.02365800 | 1.13282700  |
| C  | -2.44473000 | -3.50544000 | 0.27585600  |
| C  | -3.57691800 | 0.24330700  | -0.75206300 |
| C  | -4.31755400 | -0.16033000 | 0.37209900  |
| C  | -5.41476400 | -1.01344600 | 0.24162000  |
| C  | -5.79587000 | -1.48247000 | -1.01781600 |
| C  | -5.07323300 | -1.08842200 | -2.14529800 |
| C  | -3.97506700 | -0.23420700 | -2.01318500 |
| C  | -2.63966000 | 2.51558000  | 0.66585800  |
| C  | -3.16238300 | 3.76696600  | 0.29943200  |
| C  | -3.59077500 | 4.67298500  | 1.27399300  |
| C  | -3.51313300 | 4.34052600  | 2.62755300  |
| C  | -3.00709800 | 3.09442400  | 3.00505700  |
| C  | -2.57153400 | 2.19202900  | 2.03312500  |
| C  | 3.15257300  | 2.28147100  | -0.32261000 |
| C  | 4.55845400  | 2.32633900  | -0.25688300 |
| C  | 5.23291100  | 3.54264500  | -0.14886400 |
| C  | 4.51599300  | 4.74169500  | -0.10422700 |
| C  | 3.12318300  | 4.71391100  | -0.17386000 |
| C  | 2.44880500  | 3.49350500  | -0.28315400 |
| C  | 3.44445300  | -0.41594700 | 0.42033800  |
| C  | 4.36153000  | -1.29858100 | -0.16887400 |
| C  | 5.23838000  | -2.04533600 | 0.62425500  |
| C  | 5.21562500  | -1.91504600 | 2.01342300  |
| C  | 4.30534000  | -1.03899700 | 2.61173500  |
| C  | 3.42611100  | -0.29854400 | 1.82219700  |
| H  | 0.74467700  | -1.67665300 | -3.40797500 |
| H  | -0.81291900 | -1.21587200 | -4.10771200 |
| H  | -0.88271400 | -3.17208300 | -2.33626300 |
| H  | -2.02864000 | -1.84812300 | -2.09489000 |
| H  | -0.75309400 | 2.29200000  | -3.91874900 |
| H  | -1.88913200 | 0.94355900  | -3.92053300 |
| H  | -1.57438000 | 3.20973700  | -1.92163000 |

|   |             |             |             |
|---|-------------|-------------|-------------|
| H | -3.08245400 | 2.47148800  | -2.49640600 |
| H | 1.77006900  | 0.62793600  | -4.26102800 |
| H | 1.74805500  | 2.03685400  | -3.17284600 |
| H | 3.75170900  | 0.64145200  | -2.55644000 |
| H | 2.72327500  | -0.80397600 | -2.45526300 |
| H | 0.97970400  | -2.66532900 | 2.00761700  |
| H | 2.72875900  | -4.35069400 | 2.45563200  |
| H | 3.74937300  | -5.62751200 | 0.57783400  |
| H | 3.01819500  | -5.17959300 | -1.75766800 |
| H | 1.27116000  | -3.50995400 | -2.21650000 |
| H | -1.22642400 | -1.03128800 | 2.27263200  |
| H | -2.93030200 | -1.98151600 | 3.81222400  |
| H | -4.34944000 | -3.88720600 | 3.07421400  |
| H | -4.03734300 | -4.85493600 | 0.80540000  |
| H | -2.31254700 | -3.95071800 | -0.70808100 |
| H | -4.03985800 | 0.19026100  | 1.36317100  |
| H | -5.96915900 | -1.31298100 | 1.12728900  |
| H | -6.64986700 | -2.14589100 | -1.11950400 |
| H | -5.36277100 | -1.44135600 | -3.13131700 |
| H | -3.42860300 | 0.05235200  | -2.90847200 |
| H | -3.24578700 | 4.04707500  | -0.74694800 |
| H | -3.98917100 | 5.63737900  | 0.97129600  |
| H | -3.84643000 | 5.04616300  | 3.38299300  |
| H | -2.94499300 | 2.82437200  | 4.05587300  |
| H | -2.16336500 | 1.23153900  | 2.34099900  |
| H | 5.13354000  | 1.40292900  | -0.28865500 |
| H | 6.31816500  | 3.55354400  | -0.09784800 |
| H | 5.04096400  | 5.68858400  | -0.01613000 |
| H | 2.55590100  | 5.64022100  | -0.14221800 |
| H | 1.36265300  | 3.47906700  | -0.33777600 |
| H | 4.40956000  | -1.40790700 | -1.24923800 |
| H | 5.94169500  | -2.72582800 | 0.15150600  |
| H | 5.90147600  | -2.49232800 | 2.62694800  |
| H | 4.28015400  | -0.93237700 | 3.69267800  |
| H | 2.72138500  | 0.38140400  | 2.29735800  |
| H | 0.13758200  | 2.06685500  | -0.49823000 |
| C | 0.45325900  | 1.71991300  | 2.34631100  |
| H | 0.53069300  | 2.65210600  | 1.74182200  |
| O | 0.62219300  | 1.79234700  | 3.58012500  |
| O | 0.19902800  | 0.65674400  | 1.70193500  |

**9**

$G_{\text{solv}} = -4442.158721$

|    |             |             |             |
|----|-------------|-------------|-------------|
| Fe | -0.00006100 | 0.53987000  | 0.31248500  |
| P  | 0.41499200  | -1.71405500 | 0.43888500  |
| P  | 2.07074200  | 1.35464100  | 0.49808700  |
| P  | -2.27054900 | 0.69250900  | 0.51117100  |
| P  | 0.00141500  | 0.52215500  | 2.47762800  |
| C  | 0.17411600  | -1.18609500 | 3.16148300  |
| C  | 1.01292100  | -2.00448400 | 2.17637500  |
| C  | 1.38335300  | 1.49089500  | 3.23491800  |
| C  | 2.13790700  | 2.24634400  | 2.13614300  |
| C  | -1.59493300 | 1.12906400  | 3.15577600  |
| C  | -2.68135300 | 0.45332600  | 2.31411900  |
| C  | -0.93008400 | -2.96459300 | 0.22979600  |
| C  | -1.47692000 | -3.13149700 | -1.05642400 |

|   |             |             |             |                                  |             |             |             |
|---|-------------|-------------|-------------|----------------------------------|-------------|-------------|-------------|
| C | -2.44577300 | -4.10513800 | -1.29662400 | H                                | 3.66642500  | 0.22689400  | -1.66193400 |
| C | -2.90056600 | -4.91680500 | -0.25247700 | H                                | 5.63034100  | -1.27040200 | -1.73442200 |
| C | -2.38372500 | -4.74395700 | 1.03155500  | H                                | 6.66456700  | -2.08214300 | 0.37873800  |
| C | -1.40097200 | -3.77699300 | 1.27203500  | H                                | 5.72815600  | -1.36008900 | 2.56765000  |
| C | 1.71047900  | -2.55811100 | -0.56957300 | H                                | 3.78945900  | 0.15334700  | 2.65203800  |
| C | 1.87489500  | -2.19877100 | -1.91630600 | H                                | 4.63612600  | 2.76608600  | 0.15711200  |
| C | 2.79184100  | -2.87295900 | -2.72589700 | H                                | 5.33188800  | 4.69117500  | -1.22414700 |
| C | 3.56938300  | -3.90461300 | -2.19632300 | H                                | 3.72193300  | 5.75258900  | -2.79476000 |
| C | 3.42215900  | -4.26368800 | -0.85422600 | H                                | 1.39774900  | 4.88032700  | -2.95767800 |
| C | 2.49383400  | -3.60089600 | -0.04726500 | H                                | 0.68923100  | 2.96112400  | -1.56898900 |
| C | 3.57935800  | 0.30160800  | 0.49883100  | H                                | -5.07562900 | 1.54160800  | 0.52466000  |
| C | 4.11623100  | -0.11679700 | -0.73097900 | H                                | -6.21551700 | 3.70848500  | 0.27146800  |
| C | 5.22444300  | -0.96200200 | -0.77466200 | H                                | -4.90179800 | 5.77353900  | -0.18382500 |
| C | 5.80480300  | -1.41907700 | 0.41257000  | H                                | -2.42421400 | 5.63816400  | -0.36980600 |
| C | 5.27827600  | -1.01562100 | 1.64063900  | H                                | -1.27370300 | 3.46728300  | -0.09951200 |
| C | 4.17525600  | -0.15677100 | 1.68377100  | H                                | -4.17853200 | -1.48181800 | 1.41154900  |
| C | 2.61055900  | 2.72154500  | -0.61063200 | H                                | -5.83527300 | -2.82044000 | 0.19450300  |
| C | 3.92068500  | 3.22567300  | -0.52238300 | H                                | -6.15367300 | -2.51367500 | -2.25397500 |
| C | 4.31692300  | 4.31179700  | -1.30312600 | H                                | -4.77343300 | -0.83909100 | -3.47475300 |
| C | 3.41096400  | 4.90950600  | -2.18447400 | H                                | -3.10697700 | 0.51757800  | -2.26453600 |
| C | 2.10760100  | 4.42035500  | -2.27549300 | H                                | -0.13423000 | 2.06096600  | 0.43732500  |
| C | 1.70742600  | 3.33454400  | -1.48979700 | H                                | 0.21865100  | 0.68388800  | -1.48490000 |
| C | -3.08180500 | 2.34244800  | 0.23240000  | C                                | -0.50894700 | 0.70121100  | -2.40613800 |
| C | -4.48335800 | 2.43480900  | 0.33393500  | O                                | -0.59955600 | -0.38496400 | -3.00180700 |
| C | -5.13334500 | 3.65994500  | 0.18817800  | O                                | -0.99109100 | 1.81351900  | -2.67967900 |
| C | -4.39558300 | 4.81968700  | -0.06629500 |                                  |             |             |             |
| C | -3.00723000 | 4.74343200  | -0.16968800 |                                  |             |             |             |
| C | -2.35657400 | 3.51476200  | -0.01869000 | <b>TS<sub>9,10</sub></b>         |             |             |             |
| C | -3.50675100 | -0.38219700 | -0.33499600 | G <sub>solv</sub> = -4442.138536 |             |             |             |
| C | -4.28974100 | -1.32949700 | 0.34159500  | Fe                               | -0.01752200 | 0.49314400  | 0.39293500  |
| C | -5.23728500 | -2.09276800 | -0.34771100 | P                                | 0.27043900  | -1.74018800 | 0.43105400  |
| C | -5.41559700 | -1.92157300 | -1.72055200 | P                                | 2.06012300  | 1.20576300  | 0.60574700  |
| C | -4.63942200 | -0.98231400 | -2.40607500 | P                                | -2.22821700 | 0.71900400  | 0.55831900  |
| C | -3.69577900 | -0.21894200 | -1.71963200 | P                                | -0.02753000 | 0.38380600  | 2.55431100  |
| H | -0.83142200 | -1.61541500 | 3.27177100  | C                                | 0.09531500  | -1.35630800 | 3.18236500  |
| H | 0.63165600  | -1.15559000 | 4.15895800  | C                                | 0.87284100  | -2.17138700 | 2.14297700  |
| H | 1.01945600  | -3.06861600 | 2.44219500  | C                                | 1.38191500  | 1.28150400  | 3.36150800  |
| H | 2.05786200  | -1.65623300 | 2.19161200  | C                                | 2.17995300  | 2.02971800  | 2.28625000  |
| H | 0.98256100  | 2.17703100  | 3.99199300  | C                                | -1.62123700 | 1.00247800  | 3.24700500  |
| H | 2.03777600  | 0.77878900  | 3.75481500  | C                                | -2.71753600 | 0.42798600  | 2.33963300  |
| H | 1.64811700  | 3.20928900  | 1.93706900  | C                                | -1.13452700 | -2.92765200 | 0.19235200  |
| H | 3.17850100  | 2.45711600  | 2.41596000  | C                                | -1.67540800 | -3.07182300 | -1.09831600 |
| H | -1.69232400 | 0.88934100  | 4.22256200  | C                                | -2.70154300 | -3.98248400 | -1.34762800 |
| H | -1.62105100 | 2.22236800  | 3.04203300  | C                                | -3.22269700 | -4.75618000 | -0.30581500 |
| H | -3.68347400 | 0.84026300  | 2.53622600  | C                                | -2.71031200 | -4.60947100 | 0.98302300  |
| H | -2.68502000 | -0.62654400 | 2.51834700  | C                                | -1.67127900 | -3.70501400 | 1.23016500  |
| H | -1.13973400 | -2.49368600 | -1.87339500 | C                                | 1.48976300  | -2.60662800 | -0.65253500 |
| H | -2.85212400 | -4.22480800 | -2.29757600 | C                                | 1.57252200  | -2.22852400 | -2.00153000 |
| H | -3.65630300 | -5.67439800 | -0.43972000 | C                                | 2.42201700  | -2.89956900 | -2.88291200 |
| H | -2.73491600 | -5.36621600 | 1.85018800  | C                                | 3.21455500  | -3.95362300 | -2.42230600 |
| H | -1.00518900 | -3.67438600 | 2.27921100  | C                                | 3.14857600  | -4.33389100 | -1.07952000 |
| H | 1.27162700  | -1.39439100 | -2.33437000 | C                                | 2.28615000  | -3.67158700 | -0.20139100 |
| H | 2.90423500  | -2.58537800 | -3.76788400 | C                                | 3.52011100  | 0.07964900  | 0.57015000  |
| H | 4.28739400  | -4.42532100 | -2.82370900 | C                                | 4.01578600  | -0.35779400 | -0.67121700 |
| H | 4.02584000  | -5.06345500 | -0.43380100 | C                                | 5.08030700  | -1.25568700 | -0.73968200 |
| H | 2.38672700  | -3.90774500 | 0.99032100  | C                                | 5.65673300  | -1.75200400 | 0.43405900  |
|   |             |             |             | C                                | 5.16777800  | -1.33586900 | 1.67302400  |

|   |             |             |             |                                  |             |             |             |
|---|-------------|-------------|-------------|----------------------------------|-------------|-------------|-------------|
| C | 4.11039100  | -0.42214500 | 1.74009500  | H                                | -4.49550500 | -1.17986200 | 1.29462500  |
| C | 2.70688000  | 2.60831800  | -0.41229600 | H                                | -6.14328500 | -2.36878400 | -0.09140100 |
| C | 4.06898600  | 2.95450300  | -0.38009100 | H                                | -6.11070800 | -2.13526700 | -2.56689600 |
| C | 4.54007600  | 4.06382500  | -1.08503800 | H                                | -4.38035700 | -0.70900200 | -3.64898500 |
| C | 3.65729500  | 4.84928200  | -1.83097000 | H                                | -2.70141500 | 0.47003900  | -2.26659300 |
| C | 2.29991400  | 4.52450400  | -1.86079700 | H                                | -0.09440300 | 2.02117800  | 0.56916700  |
| C | 1.83141400  | 3.41399600  | -1.15338000 | H                                | -0.07003800 | 0.64807400  | -1.23595100 |
| C | -2.99472600 | 2.39301300  | 0.27557300  | C                                | 0.07674800  | 1.30916400  | -2.87538200 |
| C | -4.37843400 | 2.56042100  | 0.47408800  | O                                | 1.09321300  | 0.82631000  | -3.24583200 |
| C | -4.98679800 | 3.79979600  | 0.27575900  | O                                | -0.90352500 | 1.96973700  | -2.96039300 |
| C | -4.22523800 | 4.89768900  | -0.13608300 |                                  |             |             |             |
| C | -2.85494000 | 4.74567600  | -0.34417300 |                                  |             |             |             |
| C | -2.24660400 | 3.50310500  | -0.13612000 |                                  |             |             |             |
| C | -3.46954200 | -0.26892900 | -0.38461300 |                                  |             |             |             |
| C | -4.44927600 | -1.07407400 | 0.21365300  |                                  |             |             |             |
| C | -5.39192700 | -1.74694000 | -0.57106400 |                                  |             |             |             |
| C | -5.37365400 | -1.61680800 | -1.96018600 |                                  |             |             |             |
| C | -4.40154400 | -0.81580900 | -2.56775700 |                                  |             |             |             |
| C | -3.45598900 | -0.15245100 | -1.78635400 |                                  |             |             |             |
| H | -0.92653300 | -1.74267900 | 3.30469400  |                                  |             |             |             |
| H | 0.57904600  | -1.38470600 | 4.16761800  |                                  |             |             |             |
| H | 0.82133300  | -3.24841000 | 2.34721500  |                                  |             |             |             |
| H | 1.93540600  | -1.88190600 | 2.16210400  |                                  |             |             |             |
| H | 1.00293200  | 1.96715100  | 4.13062600  |                                  |             |             |             |
| H | 2.00288200  | 0.53176400  | 3.87039700  |                                  |             |             |             |
| H | 1.74407100  | 3.02486900  | 2.12127800  |                                  |             |             |             |
| H | 3.23100500  | 2.17538400  | 2.57077300  |                                  |             |             |             |
| H | -1.75827000 | 0.70295300  | 4.29438000  |                                  |             |             |             |
| H | -1.60533100 | 2.10146700  | 3.19963500  |                                  |             |             |             |
| H | -3.70316500 | 0.85433700  | 2.56411600  |                                  |             |             |             |
| H | -2.78253600 | -0.66091200 | 2.48566300  |                                  |             |             |             |
| H | -1.28617600 | -2.47089800 | -1.91939900 |                                  |             |             |             |
| H | -3.10262000 | -4.07966800 | -2.35324300 |                                  |             |             |             |
| H | -4.02388900 | -5.46391100 | -0.49923600 |                                  |             |             |             |
| H | -3.10936700 | -5.20358300 | 1.80076800  |                                  |             |             |             |
| H | -1.28233000 | -3.62455800 | 2.24163400  |                                  |             |             |             |
| H | 0.97415500  | -1.39363000 | -2.35975200 |                                  |             |             |             |
| H | 2.47080300  | -2.59312300 | -3.92460200 |                                  |             |             |             |
| H | 3.88199600  | -4.47378300 | -3.10366400 |                                  |             |             |             |
| H | 3.76511800  | -5.15070800 | -0.71364500 |                                  |             |             |             |
| H | 2.24162700  | -3.99362900 | 0.83638900  |                                  |             |             |             |
| H | 3.56953400  | 0.01372100  | -1.59323700 |                                  |             |             |             |
| H | 5.45665100  | -1.57350300 | -1.70852200 |                                  |             |             |             |
| H | 6.48254100  | -2.45586700 | 0.38091400  |                                  |             |             |             |
| H | 5.61249300  | -1.71222300 | 2.59027800  |                                  |             |             |             |
| H | 3.75483900  | -0.10244500 | 2.71705100  |                                  |             |             |             |
| H | 4.76904900  | 2.35277400  | 0.19614800  |                                  |             |             |             |
| H | 5.59675900  | 4.31450400  | -1.05084600 |                                  |             |             |             |
| H | 4.02556600  | 5.70984300  | -2.38206100 |                                  |             |             |             |
| H | 1.60382000  | 5.13258900  | -2.43233600 |                                  |             |             |             |
| H | 0.77281100  | 3.16862500  | -1.17128400 |                                  |             |             |             |
| H | -4.99303200 | 1.71462700  | 0.77740000  |                                  |             |             |             |
| H | -6.05569100 | 3.90756800  | 0.43848700  |                                  |             |             |             |
| H | -4.69970900 | 5.86180900  | -0.29522900 |                                  |             |             |             |
| H | -2.25394600 | 5.59075800  | -0.66893700 |                                  |             |             |             |
| H | -1.17715600 | 3.39126700  | -0.29063100 |                                  |             |             |             |
|   |             |             |             | <b>10</b>                        |             |             |             |
|   |             |             |             | $G_{\text{solv}} = -4442.154558$ |             |             |             |
|   |             |             |             | Fe                               | 0.04342400  | 0.43448200  | -0.52075700 |
|   |             |             |             | P                                | -0.22130300 | -1.77812600 | -0.43777400 |
|   |             |             |             | P                                | -2.01143000 | 1.14110200  | -0.76770000 |
|   |             |             |             | P                                | 2.22695700  | 0.69740900  | -0.65739800 |
|   |             |             |             | P                                | 0.06951700  | 0.21661900  | -2.66548500 |
|   |             |             |             | C                                | -0.06065200 | -1.55455300 | -3.21268900 |
|   |             |             |             | C                                | -0.80862500 | -2.33187400 | -2.12199100 |
|   |             |             |             | C                                | -1.32585400 | 1.09621400  | -3.52313400 |
|   |             |             |             | C                                | -2.13268300 | 1.89127700  | -2.48513500 |
|   |             |             |             | C                                | 1.67474400  | 0.79699400  | -3.37442400 |
|   |             |             |             | C                                | 2.76475100  | 0.31243800  | -2.40672300 |
|   |             |             |             | C                                | 1.19339000  | -2.93268400 | -0.10847900 |
|   |             |             |             | C                                | 1.70519400  | -3.01192800 | 1.19989100  |
|   |             |             |             | C                                | 2.75438200  | -3.87718400 | 1.50822900  |
|   |             |             |             | C                                | 3.32843200  | -4.66979300 | 0.50929600  |
|   |             |             |             | C                                | 2.84449200  | -4.58829000 | -0.79632900 |
|   |             |             |             | C                                | 1.78291300  | -3.72941800 | -1.10249700 |
|   |             |             |             | C                                | -1.45029900 | -2.56739800 | 0.69562500  |
|   |             |             |             | C                                | -1.57869700 | -2.05810800 | 1.99709300  |
|   |             |             |             | C                                | -2.45221400 | -2.64235400 | 2.91530400  |
|   |             |             |             | C                                | -3.22635900 | -3.74213400 | 2.53758800  |
|   |             |             |             | C                                | -3.11359700 | -4.25638900 | 1.24317400  |
|   |             |             |             | C                                | -2.22534900 | -3.68005900 | 0.33015700  |
|   |             |             |             | C                                | -3.49352300 | 0.04251900  | -0.68336900 |
|   |             |             |             | C                                | -4.03197600 | -0.28348400 | 0.57392400  |
|   |             |             |             | C                                | -5.09834400 | -1.17532700 | 0.68632500  |
|   |             |             |             | C                                | -5.63985500 | -1.76912000 | -0.45848100 |
|   |             |             |             | C                                | -5.11226400 | -1.45895200 | -1.71298700 |
|   |             |             |             | C                                | -4.04832400 | -0.55744500 | -1.82438200 |
|   |             |             |             | C                                | -2.64198100 | 2.56656000  | 0.22614200  |
|   |             |             |             | C                                | -3.92690800 | 3.08856600  | -0.00603100 |
|   |             |             |             | C                                | -4.38973600 | 4.18936200  | 0.71656100  |
|   |             |             |             | C                                | -3.57808200 | 4.78460200  | 1.68739500  |
|   |             |             |             | C                                | -2.30070300 | 4.27588400  | 1.92772100  |
|   |             |             |             | C                                | -1.83865000 | 3.17639100  | 1.19765400  |
|   |             |             |             | C                                | 2.92549900  | 2.40408700  | -0.41174100 |
|   |             |             |             | C                                | 4.23838400  | 2.70378000  | -0.81790000 |
|   |             |             |             | C                                | 4.78667300  | 3.96762700  | -0.59309800 |
|   |             |             |             | C                                | 4.03898800  | 4.95116600  | 0.06041500  |
|   |             |             |             | C                                | 2.74217500  | 4.66184700  | 0.48671300  |
|   |             |             |             | C                                | 2.19096100  | 3.39928300  | 0.24811400  |
|   |             |             |             | C                                | 3.47191700  | -0.19163500 | 0.37800800  |
|   |             |             |             | C                                | 4.50358600  | -0.98835300 | -0.13838600 |

|                                  |             |             |             |   |             |             |             |
|----------------------------------|-------------|-------------|-------------|---|-------------|-------------|-------------|
| C                                | 5.43346700  | -1.58825200 | 0.71806400  | P | 2.03900600  | 1.27429100  | 0.42884800  |
| C                                | 5.35230000  | -1.38921200 | 2.09691200  | P | -2.20555100 | 0.81497500  | 0.42239800  |
| C                                | 4.32877300  | -0.59408500 | 2.62283300  | P | -0.01341200 | 0.50661100  | 2.42302500  |
| C                                | 3.39503000  | -0.00651000 | 1.77042100  | C | 0.13681800  | -1.21640900 | 3.10308600  |
| H                                | 0.96076800  | -1.94059700 | -3.34138800 | C | 0.86342400  | -2.07657200 | 2.06080200  |
| H                                | -0.56615800 | -1.63102600 | -4.18446100 | C | 1.38426900  | 1.46569900  | 3.18468100  |
| H                                | -0.72298800 | -3.41729800 | -2.26219600 | C | 2.17735100  | 2.17115900  | 2.07316000  |
| H                                | -1.87989300 | -2.07957900 | -2.15339300 | C | -1.60859900 | 1.13550400  | 3.11190200  |
| H                                | -0.93356300 | 1.75164400  | -4.31194500 | C | -2.71226300 | 0.57174100  | 2.20573200  |
| H                                | -1.94897400 | 0.33529000  | -4.01286100 | C | -1.16343900 | -2.82938000 | 0.12002200  |
| H                                | -1.70228400 | 2.89537600  | -2.36575600 | C | -1.69846800 | -2.98843000 | -1.17140900 |
| H                                | -3.18094700 | 2.01567700  | -2.78786900 | C | -2.74888300 | -3.87458300 | -1.40741200 |
| H                                | 1.83876500  | 0.42218600  | -4.39347200 | C | -3.29945800 | -4.60800500 | -0.35152100 |
| H                                | 1.64464900  | 1.89649000  | -3.41077400 | C | -2.79190600 | -4.44640000 | 0.93777200  |
| H                                | 3.74518500  | 0.73775500  | -2.65270600 | C | -1.72926100 | -3.56636700 | 1.17175200  |
| H                                | 2.85582900  | -0.78268100 | -2.47149600 | C | 1.46917500  | -2.52881300 | -0.73667100 |
| H                                | 1.27574500  | -2.39459100 | 1.98807100  | C | 1.66249300  | -2.08099600 | -2.05260600 |
| H                                | 3.13022800  | -3.92643900 | 2.52700100  | C | 2.52749000  | -2.75414500 | -2.91836200 |
| H                                | 4.14738500  | -5.34221700 | 0.74891400  | C | 3.22648900  | -3.87839100 | -2.47405000 |
| H                                | 3.28406600  | -5.19818600 | -1.58105700 | C | 3.05104000  | -4.32981900 | -1.16330400 |
| H                                | 1.41821200  | -3.69813800 | -2.12579600 | C | 2.17253500  | -3.66549300 | -0.30368600 |
| H                                | -0.99352600 | -1.18654500 | 2.28405100  | C | 3.52871300  | 0.17914200  | 0.43740000  |
| H                                | -2.53506100 | -2.23146400 | 3.91860900  | C | 4.08763000  | -0.23139100 | -0.78533000 |
| H                                | -3.91542900 | -4.19475900 | 3.24517100  | C | 5.15480500  | -1.12949000 | -0.81994800 |
| H                                | -3.71513900 | -5.11007600 | 0.94235200  | C | 5.68182200  | -1.63873000 | 0.37095400  |
| H                                | -2.14415300 | -4.10456700 | -0.66804900 | C | 5.13711300  | -1.24010000 | 1.59313700  |
| H                                | -3.61256600 | 0.16697400  | 1.47353400  | C | 4.06943500  | -0.33743000 | 1.62572400  |
| H                                | -5.50146600 | -1.41360400 | 1.66741900  | C | 2.65026300  | 2.59210900  | -0.71359600 |
| H                                | -6.46836200 | -2.46645900 | -0.37143200 | C | 3.83592000  | 3.29338400  | -0.42857300 |
| H                                | -5.53058400 | -1.91138200 | -2.60812800 | C | 4.29013000  | 4.29931900  | -1.28242700 |
| H                                | -3.65600200 | -0.32495200 | -2.81234200 | C | 3.57230500  | 4.61330400  | -2.44079500 |
| H                                | -4.57469900 | 2.62817900  | -0.75021200 | C | 2.40058300  | 3.91741300  | -2.73945700 |
| H                                | -5.38472200 | 4.58144200  | 0.52438100  | C | 1.94284200  | 2.91488500  | -1.87898700 |
| H                                | -3.94133600 | 5.63898200  | 2.25142300  | C | -2.89902400 | 2.49777000  | 0.04063700  |
| H                                | -1.66096500 | 4.73106600  | 2.68014400  | C | -4.17516600 | 2.87372500  | 0.49588500  |
| H                                | -0.84326500 | 2.77854900  | 1.37976400  | C | -4.71545600 | 4.11796500  | 0.16518400  |
| H                                | 4.84910600  | 1.94556000  | -1.30441400 | C | -3.99857400 | 5.00102000  | -0.64654800 |
| H                                | 5.79964800  | 4.18173900  | -0.92287400 | C | -2.74047200 | 4.63153900  | -1.12469100 |
| H                                | 4.46753200  | 5.93330700  | 0.23869800  | C | -2.19472000 | 3.39209000  | -0.77869300 |
| H                                | 2.15504700  | 5.41679700  | 1.00280900  | C | -3.47363700 | -0.15441300 | -0.51021500 |
| H                                | 1.17568800  | 3.18197300  | 0.56976600  | C | -4.49912700 | -0.89508600 | 0.09522500  |
| H                                | 4.59605800  | -1.14744100 | -1.21010400 | C | -5.44872100 | -1.56266700 | -0.68600100 |
| H                                | 6.22403800  | -2.20754400 | 0.30225100  | C | -5.39299800 | -1.48911600 | -2.07841700 |
| H                                | 6.07969600  | -1.85071900 | 2.75880300  | C | -4.37578600 | -0.75202400 | -2.69305300 |
| H                                | 4.25768100  | -0.43524900 | 3.69553000  | C | -3.42282300 | -0.09651600 | -1.91476800 |
| H                                | 2.59590700  | 0.60766500  | 2.18650700  | H | -0.88039200 | -1.59273800 | 3.28471600  |
| H                                | 0.10835600  | 1.96022700  | -0.75590000 | H | 0.66398500  | -1.21608800 | 4.06652100  |
| H                                | 0.06379600  | 0.66395400  | 1.05679800  | H | 0.77881000  | -3.14719400 | 2.28766300  |
| C                                | -0.41845200 | 1.50094700  | 3.72777700  | H | 1.93546000  | -1.82552800 | 2.05239200  |
| O                                | -1.36789900 | 0.83747800  | 3.85260500  | H | 0.99369800  | 2.18728800  | 3.91438400  |
| O                                | 0.52740000  | 2.17290600  | 3.61993300  | H | 2.01701300  | 0.75697300  | 3.73612200  |
| <b>11</b>                        |             |             |             | H | 1.74460500  | 3.16163800  | 1.87543400  |
| $G_{\text{solv}} = -4253.640344$ |             |             |             | H | 3.22691900  | 2.31961200  | 2.35882800  |
| Fe                               | -0.02298800 | 0.55157200  | 0.26884100  | H | -1.75301400 | 0.84316400  | 4.16048800  |
| P                                | 0.25084400  | -1.65315700 | 0.34606000  | H | -1.58267800 | 2.23444500  | 3.05964000  |
|                                  |             |             |             | H | -3.69104500 | 1.00865400  | 2.43692500  |

|   |             |             |             |   |             |             |             |
|---|-------------|-------------|-------------|---|-------------|-------------|-------------|
| H | -2.79529600 | -0.51532300 | 2.35853900  | C | 3.29344200  | -3.71877500 | -2.47310300 |
| H | -1.28768300 | -2.41392700 | -2.00116200 | C | 3.06932400  | -4.23824100 | -1.19525700 |
| H | -3.14467400 | -3.98592900 | -2.41369600 | C | 2.16664200  | -3.61352000 | -0.33245300 |
| H | -4.11963200 | -5.29664400 | -0.53443700 | C | 3.52612400  | 0.18323200  | 0.54227100  |
| H | -3.21436300 | -5.00956200 | 1.76567900  | C | 4.18730700  | -0.22656600 | -0.62756000 |
| H | -1.34489500 | -3.47010000 | 2.18394100  | C | 5.26038900  | -1.11638800 | -0.56495000 |
| H | 1.13804300  | -1.18957600 | -2.39461700 | C | 5.69041700  | -1.61180500 | 0.66922300  |
| H | 2.66372900  | -2.39322700 | -3.93434700 | C | 5.04418000  | -1.20955200 | 1.83964800  |
| H | 3.90617600  | -4.39863600 | -3.14315100 | C | 3.96959300  | -0.31820700 | 1.77656900  |
| H | 3.59371400  | -5.20257600 | -0.80998500 | C | 2.66108700  | 2.51229200  | -0.79963300 |
| H | 2.03783900  | -4.04255700 | 0.70783300  | C | 3.76910300  | 3.32027900  | -0.48644000 |
| H | 3.67934400  | 0.15168600  | -1.72013600 | C | 4.25014000  | 4.25339200  | -1.40482200 |
| H | 5.57094500  | -1.43594500 | -1.77633000 | C | 3.64066700  | 4.38422200  | -2.65599700 |
| H | 6.51238500  | -2.33853000 | 0.34532200  | C | 2.55143000  | 3.57702900  | -2.98409000 |
| H | 5.54424300  | -1.62608000 | 2.52388200  | C | 2.06343100  | 2.64822800  | -2.05999200 |
| H | 3.66196200  | -0.03931600 | 2.58942700  | C | -2.96776300 | 2.47027000  | 0.08011400  |
| H | 4.41255100  | 3.05092400  | 0.46246900  | C | -4.25819600 | 2.80998000  | 0.52348000  |
| H | 5.20524400  | 4.83560800  | -1.04638600 | C | -4.81158700 | 4.05428100  | 0.21862700  |
| H | 3.92824800  | 5.39504600  | -3.10595800 | C | -4.09231900 | 4.97237700  | -0.55115700 |
| H | 1.84039600  | 4.15305700  | -3.64024500 | C | -2.81883200 | 4.63919500  | -1.01420400 |
| H | 1.02914400  | 2.36946500  | -2.10748800 | C | -2.25904700 | 3.39845700  | -0.69669100 |
| H | -4.76494500 | 2.19190700  | 1.10535800  | C | -3.46607600 | -0.19613000 | -0.56680100 |
| H | -5.69883200 | 4.39380900  | 0.53615100  | C | -4.52884300 | -0.92597800 | -0.01616900 |
| H | -4.42101500 | 5.96726300  | -0.90741900 | C | -5.41819800 | -1.61141300 | -0.85029000 |
| H | -2.17970800 | 5.30728100  | -1.76492800 | C | -5.26472400 | -1.56093600 | -2.23668800 |
| H | -1.20859700 | 3.11309100  | -1.14196700 | C | -4.21167700 | -0.82923500 | -2.79417700 |
| H | -4.57285200 | -0.95631400 | 1.17821900  | C | -3.31571000 | -0.15692200 | -1.96430700 |
| H | -6.23426200 | -2.13671200 | -0.20145300 | H | -0.81676500 | -1.52557000 | 3.37349500  |
| H | -6.13512800 | -2.00362800 | -2.68237200 | H | 0.75770600  | -1.09780800 | 4.05183500  |
| H | -4.32355200 | -0.69237000 | -3.77681200 | H | 0.75409000  | -3.09521700 | 2.32291100  |
| H | -2.62747800 | 0.46981900  | -2.39966200 | H | 1.94593000  | -1.81437600 | 2.05215100  |
| H | -0.08871800 | 2.09441300  | 0.38297500  | H | 0.85141900  | 2.38531400  | 3.78589200  |
| H | -0.08448100 | 0.65966600  | -1.32043600 | H | 1.92411100  | 0.98431900  | 3.78276900  |

## 12

$$G_{\text{solv}} = -4254.109127$$

|    |             |             |             |   |             |             |             |
|----|-------------|-------------|-------------|---|-------------|-------------|-------------|
| Fe | -0.05719400 | 0.57370900  | 0.25195400  | H | -1.79257100 | 0.83992300  | 4.14148000  |
| P  | 0.24827900  | -1.64731800 | 0.36819100  | H | -1.69936200 | 2.22150200  | 3.02164500  |
| P  | 2.05336000  | 1.28325500  | 0.42687800  | H | -3.74661600 | 0.87842400  | 2.43985200  |
| P  | -2.27905600 | 0.78844900  | 0.42843000  | H | -2.77270500 | -0.59756600 | 2.34314600  |
| P  | -0.04445300 | 0.56426500  | 2.42638700  | H | -1.12986200 | -2.59785000 | -2.01293400 |
| C  | 0.18060800  | -1.14098700 | 3.11897300  | H | -2.98365600 | -4.18224300 | -2.40192000 |
| C  | 0.86887100  | -2.03171300 | 2.07882200  | H | -4.08985000 | -5.31291800 | -0.48049400 |
| C  | 1.29907000  | 1.61826200  | 3.14122200  | H | -3.32531200 | -4.83487300 | 1.83804900  |
| C  | 2.12338700  | 2.26265700  | 2.01523300  | H | -1.46876900 | -3.27531600 | 2.23886600  |
| C  | -1.66974900 | 1.12412200  | 3.08871100  | H | 1.23318600  | -1.01632100 | -2.33051800 |
| C  | -2.74951800 | 0.49313600  | 2.19821000  | H | 2.79610900  | -2.15141000 | -3.86964100 |
| C  | -1.15339100 | -2.82251300 | 0.14040600  | H | 3.99110300  | -4.20957500 | -3.14556800 |
| C  | -1.60458200 | -3.08891100 | -1.16404800 | H | 3.59200200  | -5.13382800 | -0.87123800 |
| C  | -2.65157600 | -3.98279900 | -1.38660000 | H | 1.99021200  | -4.04405600 | 0.65092900  |
| C  | -3.27472200 | -4.61619600 | -0.30695900 | H | 3.86221200  | 0.15236300  | -1.59506100 |
| C  | -2.84628000 | -4.34766200 | 0.99333400  | H | 5.76099500  | -1.42168200 | -1.47990000 |
| C  | -1.79094500 | -3.45757700 | 1.21692900  | H | 6.52674800  | -2.30313900 | 0.71777900  |
| C  | 1.48944400  | -2.44806400 | -0.72977500 | H | 5.37644900  | -1.58409600 | 2.80378900  |
| C  | 1.73253900  | -1.92992800 | -2.01015100 | H | 3.47951400  | -0.01878700 | 2.70057700  |
| C  | 2.62138800  | -2.56520500 | -2.88043900 | H | 4.26643500  | 3.21872900  | 0.47613600  |
|    |             |             |             | H | 5.10249700  | 4.87488600  | -1.14552900 |



|                                        |             |             |             |   |             |             |             |
|----------------------------------------|-------------|-------------|-------------|---|-------------|-------------|-------------|
| H                                      | 4.01706500  | 5.10950200  | -3.37145600 | C | 4.89428400  | 3.97910300  | 0.21802700  |
| H                                      | 2.07788000  | 3.66717500  | -3.95752000 | C | 4.14319600  | 5.09758200  | -0.14878800 |
| H                                      | 1.21653800  | 2.02381500  | -2.33190400 | C | 2.81496400  | 4.93583800  | -0.54576300 |
| H                                      | -4.84605100 | 2.10010400  | 1.10200100  | C | 2.23717400  | 3.66421400  | -0.56418600 |
| H                                      | -5.80612500 | 4.30350700  | 0.57762400  | C | 3.41517400  | -0.14040000 | 0.67860100  |
| H                                      | -4.52516200 | 5.93920800  | -0.79108300 | C | 4.40746100  | -0.97809800 | 0.15091500  |
| H                                      | -2.25599100 | 5.34417500  | -1.61958600 | C | 5.26834400  | -1.67490400 | 1.00463200  |
| H                                      | -1.25995000 | 3.15427300  | -1.04984600 | C | 5.15082300  | -1.53783200 | 2.38870100  |
| H                                      | -4.67322700 | -0.96792300 | 1.06091500  | C | 4.16828700  | -0.69892600 | 2.92398900  |
| H                                      | -6.23342300 | -2.18097400 | -0.41245600 | C | 3.30757900  | -0.00633400 | 2.07365200  |
| H                                      | -5.96084300 | -2.09029800 | -2.88090900 | H | 0.65394600  | -1.38274900 | -3.46146300 |
| H                                      | -4.08633500 | -0.78797800 | -3.87249400 | H | -0.95053400 | -0.87625400 | -4.00343600 |
| H                                      | -2.49208800 | 0.40672200  | -2.40261800 | H | -0.83759700 | -2.98774600 | -2.39112200 |
| H                                      | -0.14044600 | 2.09277900  | 0.43328800  | H | -2.02751000 | -1.73409700 | -2.00927200 |
| H                                      | -0.20922200 | 1.11567400  | -1.25782700 | H | -0.68965500 | 2.68530100  | -3.52708200 |
| H                                      | -0.07998700 | 0.28238100  | -1.34862900 | H | -1.83606800 | 1.36555100  | -3.77193700 |
| <b>TS<sub>12,1</sub></b>               |             |             |             | H | -1.66024000 | 3.37163400  | -1.49888600 |
| <b>G<sub>solv</sub> = -4254.083069</b> |             |             |             | H | -3.11373300 | 2.63619600  | -2.19945000 |
| Fe                                     | 0.01650400  | 0.59531300  | -0.20636600 | H | 1.79543900  | 0.79466200  | -4.06572800 |
| P                                      | -0.26933500 | -1.63618700 | -0.38785100 | H | 1.78847300  | 2.21149200  | -2.99381500 |
| P                                      | -2.08292100 | 1.30250700  | -0.38326200 | H | 3.74196100  | 0.78991500  | -2.32008300 |
| P                                      | 2.25110100  | 0.83056400  | -0.34579800 | H | 2.69121500  | -0.64595600 | -2.22986000 |
| P                                      | 0.02574100  | 0.67178100  | -2.35470100 | H | 1.09922600  | -2.73143900 | 1.92858600  |
| C                                      | -0.31340700 | -0.99097800 | -3.11661900 | H | 2.97041400  | -4.31822800 | 2.22299000  |
| C                                      | -0.95037600 | -1.93789100 | -2.09143100 | H | 4.07295300  | -5.33708900 | 0.23776000  |
| C                                      | -1.22321200 | 1.87314700  | -3.01645700 | H | 3.29384700  | -4.74091600 | -2.04759200 |
| C                                      | -2.08865900 | 2.43001300  | -1.86698500 | H | 1.42380900  | -3.17058400 | -2.35577100 |
| C                                      | 1.68776800  | 1.11776600  | -3.02252300 | H | -1.33009900 | -0.87114100 | 2.19020400  |
| C                                      | 2.72115200  | 0.44731100  | -2.10561300 | H | -2.90982600 | -1.93808300 | 3.78398300  |
| C                                      | 1.11731200  | -2.83750200 | -0.23470700 | H | -4.02322300 | -4.07859900 | 3.17975200  |
| C                                      | 1.57665300  | -3.17064500 | 1.05239200  | H | -3.53088500 | -5.15882600 | 0.99647600  |
| C                                      | 2.63101800  | -4.06714200 | 1.22160800  | H | -1.90508600 | -4.13626300 | -0.56105400 |
| C                                      | 3.25203900  | -4.63798300 | 0.10607300  | H | -3.97350000 | 0.00383800  | 1.46300600  |
| C                                      | 2.81543600  | -4.30279900 | -1.17601700 | H | -5.83319400 | -1.58447000 | 1.13516300  |
| C                                      | 1.75337100  | -3.40847200 | -1.34703900 | H | -6.51511800 | -2.25824800 | -1.16303500 |
| C                                      | -1.50024500 | -2.43216600 | 0.71487700  | H | -5.32487000 | -1.30762800 | -3.13034400 |
| C                                      | -1.79517800 | -1.82460400 | 1.94238800  | H | -3.45788300 | 0.26267700  | -2.81500700 |
| C                                      | -2.69185600 | -2.41836300 | 2.83405200  | H | -4.35218800 | 3.19560300  | -0.00883100 |
| C                                      | -3.31877300 | -3.61799800 | 2.49303400  | H | -5.02463900 | 4.61449500  | 1.90543700  |
| C                                      | -3.04192400 | -4.22636900 | 1.26433200  | H | -3.71378100 | 4.56966700  | 4.01531500  |
| C                                      | -2.12967600 | -3.64306300 | 0.38307500  | H | -1.70957900 | 3.11082900  | 4.20279600  |
| C                                      | -3.56881400 | 0.24787100  | -0.64789900 | H | -1.00861300 | 1.71121400  | 2.27449400  |
| C                                      | -4.26138700 | -0.28255800 | 0.45353200  | H | 4.92507900  | 1.84768800  | 0.47133700  |
| C                                      | -5.31387000 | -1.18042100 | 0.27003300  | H | 5.92967900  | 4.09400100  | 0.52636600  |
| C                                      | -5.69627300 | -1.55916900 | -1.01980100 | H | 4.59037000  | 6.08716000  | -0.12566700 |
| C                                      | -5.02689500 | -1.02734200 | -2.12391700 | H | 2.22316400  | 5.79899000  | -0.83766200 |
| C                                      | -3.97045400 | -0.13140900 | -1.93957500 | H | 1.19647200  | 3.55263200  | -0.86279000 |
| C                                      | -2.62742800 | 2.36354200  | 1.00207400  | H | 4.52186700  | -1.09283500 | -0.92422800 |
| C                                      | -3.76391100 | 3.18242500  | 0.90726500  | H | 6.03140400  | -2.32419100 | 0.58397900  |
| C                                      | -4.14813900 | 3.97808400  | 1.98758000  | H | 5.82280500  | -2.07900300 | 3.04848800  |
| C                                      | -3.40979000 | 3.95246200  | 3.17480700  | H | 4.07681000  | -0.58176600 | 4.00024200  |
| C                                      | -2.28373800 | 3.13371400  | 3.28076800  | H | 2.55435400  | 0.65998800  | 2.49224000  |
| C                                      | -1.89215400 | 2.34538300  | 2.19600100  | H | 0.04296100  | 2.13001000  | -0.13705000 |
| C                                      | 2.97873600  | 2.52998500  | -0.19402700 | H | 0.52975600  | -0.12542800 | 3.09039400  |
| C                                      | 4.32019100  | 2.70646400  | 0.18938800  | H | 0.31685400  | 0.16233300  | 3.74508900  |
